# Supplementary material for: An application of machine learning to haematological diagnosis
Source: PubMed Central journal article supplement (PMC5765139; doi:10.1038/s41598-017-18564-8), 2018-01-11
Supplement: 41598_2017_18564_MOESM1_ESM.pdf [file 41598_2017_18564_MOESM1_ESM.pdf]

## An application of machine learning to haematological diagnosis

Gregor Gunčar<sup>1,¶</sup>, Matjaž Kukar<sup>1,¶</sup>, Mateja Notar<sup>1</sup>, Miran Brvar<sup>2</sup>, Peter Černelč<sup>3</sup>, Manca Notar<sup>1</sup>, Marko Notar<sup>1,\*</sup>

### Supplementary Information

**Supplementary Table S1. Basic set of 61 parameters used for SBA-HEM061 predictive model**

| parameter name                         |                                                 |
|----------------------------------------|-------------------------------------------------|
| Age                                    | Leukocyte count, WBC                            |
| Alanine Aminotransferase, ALT, GPT     | Lymphocyte %                                    |
| Alkaline Phosphatase, AP               | Lymphocyte count                                |
| Aspartate Aminotransferase, AST, GOT   | Mean Corpuscular Hemoglobin Concentration, MCHC |
| Band neutrophil %                      | Mean Corpuscular Hemoglobin, MCH                |
| Basophils %                            | Mean Corpuscular Volume, MCV                    |
| Basophils count                        | Mean Platelet Volume, MPV                       |
| Bilirubin Direct                       | Metamyelocytes %                                |
| Bilirubin, Total                       | Monocyte %                                      |
| Blast cells %                          | Monocyte count                                  |
| C-Reactive Protein, CRP                | Myelocytes %                                    |
| Calcium, Ca                            | Neutrophils %                                   |
| Carbon dioxide content, arterial blood | Neutrophils count                               |
| Chloride, Cl                           | Phosphate                                       |
| Creatinine                             | Platelet distribution width, PDW                |
| Eosinophils %                          | Potassium, K                                    |
| Eosinophils count                      | Promonocytes %                                  |
| Erythroblast %                         | Promyelocyte %                                  |
| Erythroblasts count                    | Proteins, total                                 |
| Erythrocyte count, RBC                 | Reticulocyte hemoglobin equivalent, Ret-He      |
| Erythrocyte Distribution Width, RDW    | Reticulocytes %                                 |
| Ferritin                               | Reticulocytes count, urgent automated           |
| Gamma-Glutamyltransferase, GGT         | Sex                                             |
| Glucose                                | Sodium, Na                                      |
| Hematocrit                             | SPE Albumin                                     |
| Hemoglobin                             | Thrombocytes count, Platelet count              |
| Hypochromic red cells %, Hypo-He       | Transferrin saturation %                        |
| Immature Granulocytes %                | Urea                                            |
| Immature granulocytes count            | Uric acid                                       |
| Iron-binding capacity, total           |                                                 |
| Iron, Fe                               |                                                 |
| Lactate Dehydrogenase, LD              |                                                 |

Supplementary Data S2. Twenty cases used in clinical test with all laboratory blood tests and SBA-HEM181 predictive model results

## Smart Blood Analytics report #605

 #68 primer 1

Male,

### Blood Parameters

Lab Test Date: /

#### Hematology

|                                                 |                                                                                     | Value  | Unit    | Reference range |
|-------------------------------------------------|-------------------------------------------------------------------------------------|--------|---------|-----------------|
| Leukocyte count, WBC                            |    | 2.99   | 1E9/L   | 4-10            |
| Neutrophils count                               |    | 0.87   | 1E9/L   | 1.5-7.4         |
| Lymphocyte count                                |                                                                                     | 1.82   | 1E9/L   | 1-3.4           |
| Monocyte count                                  |    | 0.18   | 1E9/L   | 0.21-0.92       |
| Eosinophils count                               |                                                                                     | 0.09   | 1E9/L   | 0.02-0.67       |
| Basophils count                                 |                                                                                     | 0      | 1E9/L   | 0-0.13          |
| Immature granulocytes count                     |    | 0.03   | 1E9/L   | 0-0             |
| Erythroblasts count                             |                                                                                     | 0      | 1E9/L   | 0-0             |
| Neutrophils %                                   |  | 0.29   | 1       | 0.4-0.7         |
| Lymphocyte %                                    |  | 0.61   | 1       | 0.22-0.44       |
| Monocyte %                                      |                                                                                     | 0.06   | 1       | 0.04-0.11       |
| Eosinophils %                                   |                                                                                     | 0.03   | 1       | 0-0.08          |
| Basophils %                                     |                                                                                     | 0      | 1       | 0-0.03          |
| Immature Granulocytes %                         |                                                                                     | 0.003  | 1       | 0-0.01          |
| Erythroblast %                                  |  | 0.01   | 1       | 0-0             |
| Hemoglobin                                      |  | 76     | g/L     | 130-170         |
| Hematocrit                                      |  | 0.215  | 1       | 0.4-0.5         |
| Erythrocyte count, RBC                          |  | 1.89   | 1E12/L  | 4.5-5.9         |
| Mean Corpuscular Volume, MCV                    |  | 113.8  | fL      | 83-101          |
| Mean Corpuscular Hemoglobin, MCH                |  | 40.2   | pg/cell | 27-32           |
| Mean Corpuscular Hemoglobin Concentration, MCHC |  | 353    | g/L     | 315-345         |
| Erythrocyte Distribution Width, RDW             |  | 0.146  | 1       | 0.116-0.14      |
| Reticulocytes count, urgent automated           |                                                                                     | 24.9   | 1E9/L   | 20-100          |
| Reticulocytes %                                 |                                                                                     | 0.0132 | 1       | 0.005-0.025     |
| Hypochromic red cells %, Hypo-He                |                                                                                     | 2      | %       | 0-2.7           |
| Thrombocytes count, Platelet count              |  | 20     | 1E9/L   | 150-410         |
| Blast cells %                                   |                                                                                     | 0      | 1       | 0-0.05          |
| Promonocytes %                                  |                                                                                     | 0      | 1       | 0-0             |
| Myelocytes %                                    |                                                                                     | 0      | 1       | 0-0             |
| Metamyelocytes %                                |  | 0.01   | 1       | 0.13-0.32       |
| Band neutrophil %                               |                                                                                     | 0      | 1       | 0-0.1           |

#### Blood gas analysis and hemoglobins

|                                            |                                                                                     | Value | Unit   | Reference range |
|--------------------------------------------|-------------------------------------------------------------------------------------|-------|--------|-----------------|
| Reticulocyte hemoglobin equivalent, Ret-He |  | 35.8  | pg     | 28-35           |
| Carbon dioxide content, arterial blood     |                                                                                     | 28    | mmol/L | 24-32           |

#### Biochemistry

|                              |                                                                                       | Value | Unit   | Reference range |
|------------------------------|---------------------------------------------------------------------------------------|-------|--------|-----------------|
| Glucose                      |   | 6.1   | mmol/L | 4.1-5.6         |
| Urea                         |                                                                                       | 6.1   | mmol/L | 2.1-7.1         |
| Potassium, K                 |                                                                                       | 4.5   | mmol/L | 3.5-5           |
| Sodium, Na                   |                                                                                       | 141   | mmol/L | 136-145         |
| Chloride, Cl                 |  | 107   | mmol/L | 98-106          |
| Calcium, Ca                  |                                                                                       | 2.34  | mmol/L | 2.15-2.5        |
| Phosphate                    |  | 0.74  | mmol/L | 0.87-1.45       |
| Creatinine                   |                                                                                       | 73    | µmol/L | 0-133           |
| Uric acid                    |                                                                                       | 258   | µmol/L | 150-480         |
| Bilirubin, Total             |  | 5     | µmol/L | 5.1-17          |
| Bilirubin Direct             |                                                                                       | 2     | µmol/L | 1.7-5.1         |
| Iron, Fe                     |                                                                                       | 25.1  | µmol/L | 11.6-31.3       |
| Iron-binding capacity, total |                                                                                       | 49.7  | µmol/L | 40.8-76.7       |

#### Protein and amino acid analysis

|                          |                                                                                       | Value | Unit | Reference range |
|--------------------------|---------------------------------------------------------------------------------------|-------|------|-----------------|
| Proteins, total          |                                                                                       | 73    | g/L  | 63-79           |
| SPE Albumin              |                                                                                       | 45    | g/L  | 35-50           |
| Transferrin saturation % |  | 0.505 | 1    | 0.2-0.5         |
| Ferritin                 |  | 387   | µg/L | 30-300          |
| C-Reactive Protein, CRP  |  | 10    | mg/L | 0-5             |

#### Enzymes

|                                      |                                                                                       | Value | Unit   | Reference range |
|--------------------------------------|---------------------------------------------------------------------------------------|-------|--------|-----------------|
| Alkaline Phosphatase, AP             |  | 0.84  | µkat/L | 0.9-2.18        |
| Aspartate Aminotransferase, AST, GOT |                                                                                       | 0.34  | µkat/L | 0.17-1          |
| Alanine Aminotransferase, ALT, GPT   |                                                                                       | 0.36  | µkat/L | 0.22-0.68       |

Plasma cells %

0 1 0-0

Gamma-Glutamyltransferase, GGT

0.29 µkat/L <sup>0-0.94</sup>

Lactate Dehydrogenase, LD

H 4.07 µkat/L <sup>1.7-3.2</sup>

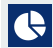

## Smart Blood Analytics Report

Model used: Hematology (CT181)

Report Date: 2017/05/30

| ICD | Prevalence | Prediction | Information | Description                                                 |
|-----|------------|------------|-------------|-------------------------------------------------------------|
| D46 | 5.56%      | 36.20%     | 2.70        | <b>Myelodysplastic syndromes</b>                            |
| D75 | 6.64%      | 15.80%     | 1.25        | <b>Other diseases of blood and blood-forming organs</b>     |
| C92 | 7.01%      | 8.20%      | 0.23        | <b>Myeloid leukaemia</b>                                    |
| D64 | 2.65%      | 6.00%      | 1.18        | <b>Other anaemias</b>                                       |
| C91 | 8.45%      | 5.60%      | -0.59       | <b>Lymphoid leukaemia</b>                                   |
| D53 | 1.14%      | 4.40%      | 1.94        | <b>Other nutritional anaemias</b>                           |
| D69 | 9.02%      | 3.40%      | -1.41       | <b>Purpura and other haemorrhagic conditions</b>            |
| D61 | 0.34%      | 3.00%      | 3.14        | <b>Other aplastic anaemias</b>                              |
| C90 | 8.99%      | 2.60%      | -1.79       | <b>Multiple myeloma and malignant plasma cell neoplasms</b> |
| C83 | 2.02%      | 2.00%      | -0.01       | <b>Diffuse non-Hodgkin lymphoma</b>                         |

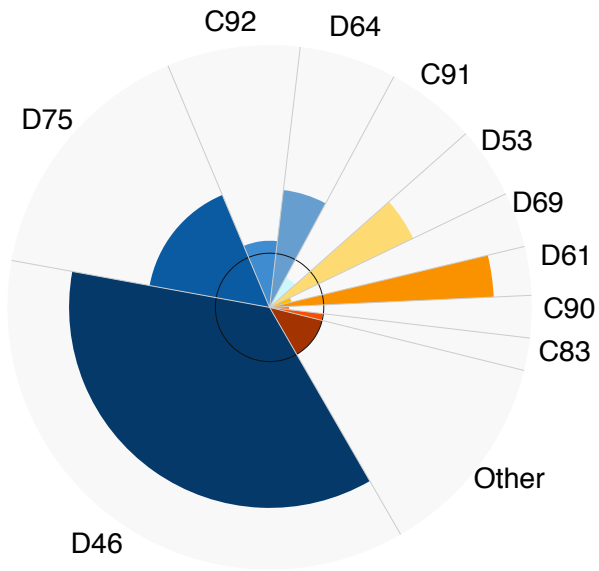

## Smart Blood Analytics report #606

**i** #69 primer 2

Male,

### Blood Parameters

Lab Test Date: /

#### Hematology

|                                                 |          | Value | Unit         | Reference range |
|-------------------------------------------------|----------|-------|--------------|-----------------|
| Leukocyte count, WBC                            | <b>L</b> | 1.39  | 1E9/L        | 4-10            |
| Neutrophils count                               | <b>L</b> | 0.06  | 1E9/L        | 1.5-7.4         |
| Lymphocyte count                                |          | 1.31  | 1E9/L        | 1-3.4           |
| Monocyte count                                  | <b>L</b> | 0.01  | 1E9/L        | 0.21-0.92       |
| Eosinophils count                               | <b>L</b> | 0.01  | 1E9/L        | 0.02-0.67       |
| Basophils count                                 |          | 0     | 1E9/L        | 0-0.13          |
| Immature granulocytes count                     |          | 0     | 1E9/L        | 0-0             |
| Erythroblasts count                             |          | 0     | 1E9/L        | 0-0             |
| Neutrophils %                                   | <b>L</b> | 0.04  | 1            | 0.4-0.7         |
| Lymphocyte %                                    | <b>H</b> | 94    | %            | 22-44           |
| Monocyte %                                      | <b>L</b> | 1     | %            | 4-11            |
| Eosinophils %                                   |          | 1     | %            | 0-8             |
| Basophils %                                     |          | 0     | %            | 0-3             |
| Immature Granulocytes %                         |          | 0     | %            | 0-1             |
| Erythroblast %                                  |          | 0     | %            | 0-0             |
| Hemoglobin                                      | <b>L</b> | 46    | g/L          | 130-170         |
| Hematocrit                                      | <b>L</b> | 0.131 | 1            | 0.4-0.5         |
| Erythrocyte count, RBC                          | <b>L</b> | 1.26  | 1E6/ $\mu$ L | 4.5-5.9         |
| Mean Corpuscular Volume, MCV                    | <b>H</b> | 104   | fL           | 83-101          |
| Mean Corpuscular Hemoglobin, MCH                | <b>H</b> | 36.5  | pg/cell      | 27-32           |
| Mean Corpuscular Hemoglobin Concentration, MCHC | <b>H</b> | 351   | g/L          | 315-345         |
| Erythrocyte Distribution Width, RDW             |          | 13.2  | %            | 11.6-14         |
| Thrombocytes count, Platelet count              | <b>L</b> | 14    | 1E9/L        | 150-410         |
| Blast cells %                                   |          | 0     | 1            | 0-0.05          |
| Promonocytes %                                  |          | 0     | 1            | 0-0             |
| Myelocytes %                                    |          | 0     | 1            | 0-0             |
| Metamyelocytes %                                | <b>L</b> | 0     | 1            | 0.13-0.32       |
| Band neutrophil %                               |          | 0     | 1            | 0-0.1           |
| Plasmacytes %                                   |          | 0     | 1            | 0-0             |

#### Biochemistry

|                              |          | Value | Unit        | Reference range |
|------------------------------|----------|-------|-------------|-----------------|
| Glucose                      | <b>H</b> | 5.7   | mmol/L      | 4.1-5.6         |
| Urea                         | <b>H</b> | 10.6  | mmol/L      | 2.1-7.1         |
| Sodium, Na                   |          | 136   | mmol/L      | 136-145         |
| Chloride, Cl                 |          | 100   | mmol/L      | 98-106          |
| Calcium, Ca                  | <b>L</b> | 2.06  | mmol/L      | 2.15-2.5        |
| Phosphate                    |          | 1.18  | mmol/L      | 0.87-1.45       |
| Creatinine                   |          | 91    | $\mu$ mol/L | 0-133           |
| Uric acid                    |          | 217   | $\mu$ mol/L | 150-480         |
| Iron, Fe                     |          | 20.2  | $\mu$ mol/L | 11.6-31.3       |
| Iron-binding capacity, total |          | 43.5  | $\mu$ mol/L | 40.8-76.7       |

#### Blood gas analysis and hemoglobins

|                                        |          | Value | Unit   | Reference range |
|----------------------------------------|----------|-------|--------|-----------------|
| Carbon dioxide content, arterial blood | <b>L</b> | 23    | mmol/L | 24-32           |

#### Protein and amino acid analysis

|                          |          | Value | Unit      | Reference range |
|--------------------------|----------|-------|-----------|-----------------|
| Proteins, total          |          | 65    | g/L       | 63-79           |
| SPE Albumin              |          | 39    | g/L       | 35-50           |
| Transferrin saturation % |          | 0.464 | 1         | 0.2-0.5         |
| Ferritin                 | <b>H</b> | 511   | $\mu$ g/L | 30-300          |
| C-Reactive Protein, CRP  | <b>H</b> | 85    | mg/L      | 0-5             |

#### Enzymes

|                                      |  | Value | Unit        | Reference range |
|--------------------------------------|--|-------|-------------|-----------------|
| Alkaline Phosphatase, AP             |  | 1.70  | $\mu$ kat/L | 0.9-2.18        |
| Aspartate Aminotransferase, AST, GOT |  | 0.53  | $\mu$ kat/L | 0.17-1          |
| Alanine Aminotransferase, ALT, GPT   |  | 0.49  | $\mu$ kat/L | 0.22-0.68       |
| Gamma-Glutamyltransferase, GGT       |  | 0.73  | $\mu$ kat/L | 0-0.94          |

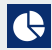

## Smart Blood Analytics Report

Model used: Hematology  
(CT181)

Report Date: 2017/05/30

|                                                                                     | ICD | Prevalence | Prediction | Information | Description                                                 |
|-------------------------------------------------------------------------------------|-----|------------|------------|-------------|-------------------------------------------------------------|
|    | C92 | 7.01%      | 41.20%     | 2.56        | <b>Myeloid leukaemia</b>                                    |
|    | D46 | 5.56%      | 17.40%     | 1.65        | <b>Myelodysplastic syndromes</b>                            |
|    | D75 | 6.64%      | 10.60%     | 0.67        | <b>Other diseases of blood and blood-forming organs</b>     |
|    | C91 | 8.45%      | 5.20%      | -0.70       | <b>Lymphoid leukaemia</b>                                   |
|    | D61 | 0.34%      | 4.80%      | 3.82        | <b>Other aplastic anaemias</b>                              |
|    | C93 | 0.45%      | 4.20%      | 3.22        | <b>Monocytic leukaemia</b>                                  |
|    | C90 | 8.99%      | 3.80%      | -1.24       | <b>Multiple myeloma and malignant plasma cell neoplasms</b> |
|  | D53 | 1.14%      | 3.20%      | 1.48        | <b>Other nutritional anaemias</b>                           |
|  | C94 | 0.11%      | 2.20%      | 4.33        | <b>Other leukaemias of specified cell type</b>              |
|  | D64 | 2.65%      | 1.40%      | -0.92       | <b>Other anaemias</b>                                       |

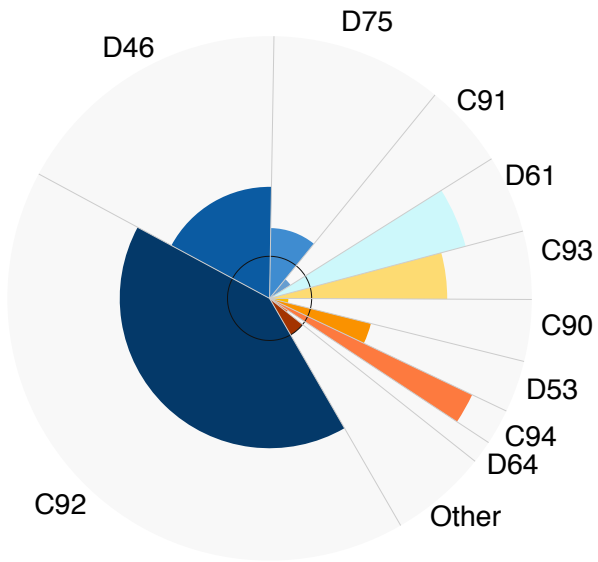

## Smart Blood Analytics report #607

**i** #70 primer 3

Male,  

### **🔹** Blood Parameters

Lab Test Date: /

#### Hematology

|                                                 |   | Value  | Unit    | Reference range |
|-------------------------------------------------|---|--------|---------|-----------------|
| Leukocyte count, WBC                            | H | 11     | 1E9/L   | 4-10            |
| Neutrophils count                               | H | 8.69   | 1E9/L   | 1.5-7.4         |
| Lymphocyte count                                |   | 2.20   | 1E9/L   | 1-3.4           |
| Monocyte count                                  | L | 0      | 1E9/L   | 0.21-0.92       |
| Eosinophils count                               | L | 0      | 1E9/L   | 0.02-0.67       |
| Basophils count                                 |   | 0.09   | 1E9/L   | 0-0.13          |
| Immature granulocytes count                     |   | 0      | 1E9/L   | 0-0             |
| Erythroblasts count                             |   | 0      | 1E9/L   | 0-0             |
| Neutrophils %                                   | H | 0.78   | 1       | 0.4-0.7         |
| Lymphocyte %                                    | L | 0.20   | 1       | 0.22-0.44       |
| Monocyte %                                      | L | 0      | 1       | 0.04-0.11       |
| Basophils %                                     |   | 0.01   | 1       | 0-0.03          |
| Immature Granulocytes %                         |   | 0.005  | 1       | 0-0.01          |
| Hemoglobin                                      | L | 121    | g/L     | 130-170         |
| Hematocrit                                      | L | 0.392  | 1       | 0.4-0.5         |
| Erythrocyte count, RBC                          | H | 5.93   | 1E12/L  | 4.5-5.9         |
| Mean Corpuscular Volume, MCV                    | L | 66.1   | fL      | 83-101          |
| Mean Corpuscular Hemoglobin, MCH                | L | 20.4   | pg/cell | 27-32           |
| Mean Corpuscular Hemoglobin Concentration, MCHC | L | 309    | g/L     | 315-345         |
| Erythrocyte Distribution Width, RDW             | H | 0.16   | 1       | 0.116-0.14      |
| Reticulocytes count, urgent automated           |   | 82.4   | 1E9/L   | 20-100          |
| Reticulocytes %                                 |   | 0.0139 | 1       | 0.005-0.025     |
| Hypochromic red cells %, Hypo-He                | H | 0.109  | 1       | 0-0.027         |
| Thrombocytes count, Platelet count              |   | 368    | 1E9/L   | 150-410         |
| Mean Platelet Volume, MPV                       |   | 9.6    | fL      | 9.4-12.2        |
| Platelet distribution width, PDW                | L | 10.9   |         | 11-16.9         |
| Blast cells %                                   |   | 0      | 1       | 0-0.05          |
| Promonocytes %                                  |   | 0      | 1       | 0-0             |
| Myelocytes %                                    |   | 0      | 1       | 0-0             |
| Metamyelocytes %                                | L | 0      | 1       | 0.13-0.32       |
| Band neutrophil %                               |   | 0.01   | 1       | 0-0.1           |

#### Blood gas analysis and hemoglobins

|                                            |   | Value | Unit   | Reference range |
|--------------------------------------------|---|-------|--------|-----------------|
| Reticulocyte hemoglobin equivalent, Ret-He | L | 21.1  | pg     | 28-35           |
| Carbon dioxide content, arterial blood     | H | 33    | mmol/L | 24-32           |

#### Biochemistry

|                              |   | Value | Unit   | Reference range |
|------------------------------|---|-------|--------|-----------------|
| Glucose                      |   | 4.5   | mmol/L | 4.1-5.6         |
| Urea                         |   | 4.3   | mmol/L | 2.1-7.1         |
| Potassium, K                 | H | 5.50  | mmol/L | 3.5-5           |
| Sodium, Na                   |   | 143   | mmol/L | 136-145         |
| Chloride, Cl                 | H | 107   | mmol/L | 98-106          |
| Calcium, Ca                  |   | 2.15  | mmol/L | 2.15-2.5        |
| Phosphate                    | L | 0.85  | mmol/L | 0.87-1.45       |
| Creatinine                   |   | 62    | µmol/L | 0-133           |
| Uric acid                    |   | 313   | µmol/L | 150-480         |
| Bilirubin, Total             |   | 7     | µmol/L | 5.1-17          |
| Bilirubin Direct             |   | 3     | µmol/L | 1.7-5.1         |
| Iron, Fe                     |   | 19.6  | µmol/L | 11.6-31.3       |
| Iron-binding capacity, total |   | 62.1  | µmol/L | 40.8-76.7       |

#### Protein and amino acid analysis

|                          |  | Value | Unit | Reference range |
|--------------------------|--|-------|------|-----------------|
| Proteins, total          |  | 66    | g/L  | 63-79           |
| SPE Albumin              |  | 42    | g/L  | 35-50           |
| Transferrin saturation % |  | 0.316 | 1    | 0.2-0.5         |
| Ferritin                 |  | 51    | µg/L | 30-300          |
| C-Reactive Protein, CRP  |  | 4     | mg/L | 0-5             |

#### Enzymes

|                                      |  | Value | Unit   | Reference range |
|--------------------------------------|--|-------|--------|-----------------|
| Alkaline Phosphatase, AP             |  | 1.57  | µkat/L | 0.9-2.18        |
| Aspartate Aminotransferase, AST, GOT |  | 0.36  | µkat/L | 0.17-1          |
| Alanine Aminotransferase, ALT, GPT   |  | 0.39  | µkat/L | 0.22-0.68       |



|               |   |   |        |                                |      |        |         |
|---------------|---|---|--------|--------------------------------|------|--------|---------|
| Eosinophils % | 0 | 1 | 0-0.08 | Gamma-Glutamyltransferase, GGT | 0.26 | µkat/L | 0-0.94  |
| Plasmacytes % | 0 | 1 | 0-0    | Lactate Dehydrogenase, LD      | 3.41 | µkat/L | 1.7-3.2 |

|                                                                                                                       |                                |                         |
|-----------------------------------------------------------------------------------------------------------------------|--------------------------------|-------------------------|
|  <b>Smart Blood Analytics Report</b> | Model used: Hematology (CT181) | Report Date: 2017/05/30 |
|-----------------------------------------------------------------------------------------------------------------------|--------------------------------|-------------------------|

| ICD | Prevalence | Prediction | Information | Description                                                                                             |
|-----|------------|------------|-------------|---------------------------------------------------------------------------------------------------------|
| D50 | 14.45%     | 26.60%     | 0.88        | <b>Iron deficiency anaemia</b>                                                                          |
| D56 | 0.39%      | 17.40%     | 5.48        | <b>Thalassaemia</b>                                                                                     |
| D47 | 18.50%     | 16.20%     | -0.19       | <b>Other neoplasms of uncertain or unknown behaviour of lymphoid, haematopoietic and related tissue</b> |
| D45 | 2.47%      | 9.80%      | 1.99        | <b>Polycythaemia vera</b>                                                                               |
| D69 | 9.02%      | 5.20%      | -0.80       | <b>Purpura and other haemorrhagic conditions</b>                                                        |
| D64 | 2.65%      | 4.00%      | 0.59        | <b>Other anaemias</b>                                                                                   |
| D75 | 6.64%      | 3.80%      | -0.81       | <b>Other diseases of blood and blood-forming organs</b>                                                 |
| D68 | 1.20%      | 3.00%      | 1.32        | <b>Other coagulation defects</b>                                                                        |
| D46 | 5.56%      | 2.60%      | -1.10       | <b>Myelodysplastic syndromes</b>                                                                        |
| D72 | 0.85%      | 1.40%      | 0.72        | <b>Other disorders of white blood cells</b>                                                             |

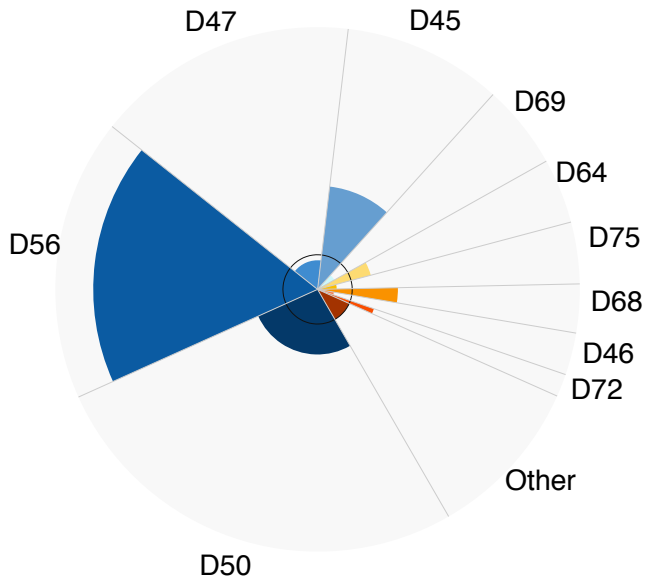

## Smart Blood Analytics report #609

**i** #71 primer 4

Female,

### **🔹** Blood Parameters

Lab Test Date: /

#### Hematology

|                                                 | Value         | Unit    | Reference range |
|-------------------------------------------------|---------------|---------|-----------------|
| Leukocyte count, WBC                            | <b>L</b> 3.99 | 1E9/L   | 4-10            |
| Neutrophils count                               | 2.63          | 1E9/L   | 1.5-7.4         |
| Lymphocyte count                                | 1             | 1E9/L   | 1-3.4           |
| Monocyte count                                  | 0.28          | 1E9/L   | 0.21-0.92       |
| Eosinophils count                               | 0.04          | 1E9/L   | 0.02-0.67       |
| Basophils count                                 | 0.04          | 1E9/L   | 0-0.13          |
| Immature granulocytes count                     | 0             | 1E9/L   | 0-0             |
| Erythroblasts count                             | 0             | 1E9/L   | 0-0             |
| Neutrophils %                                   | 0.66          | 1       | 0.4-0.7         |
| Lymphocyte %                                    | 0.25          | 1       | 0.22-0.44       |
| Monocyte %                                      | 0.07          | 1       | 0.04-0.11       |
| Eosinophils %                                   | 0.01          | 1       | 0-0.08          |
| Basophils %                                     | 0.01          | 1       | 0-0.03          |
| Immature Granulocytes %                         | 0             | 1       | 0-0.01          |
| Hemoglobin                                      | 128           | g/L     | 120-150         |
| Hematocrit                                      | 0.391         | 1       | 0.36-0.46       |
| Erythrocyte count, RBC                          | 4.22          | 1E12/L  | 4-5.2           |
| Mean Corpuscular Volume, MCV                    | 92.7          | fL      | 83-101          |
| Mean Corpuscular Hemoglobin, MCH                | 30.3          | pg/cell | 27-32           |
| Mean Corpuscular Hemoglobin Concentration, MCHC | 327           | g/L     | 315-345         |
| Erythrocyte Distribution Width, RDW             | 0.135         | 1       | 0.116-0.14      |
| Thrombocytes count, Platelet count              | 316           | 1E9/L   | 150-410         |
| Mean Platelet Volume, MPV                       | 10            | fL      | 9.2-12.9        |
| Platelet distribution width, PDW                | <b>L</b> 10.5 |         | 11-16.9         |
| Blast cells %                                   | 0             | 1       | 0-0.05          |
| Promonocytes %                                  | 0             | 1       | 0-0             |
| Myelocytes %                                    | 0             | 1       | 0-0             |
| Metamyelocytes %                                | <b>L</b> 0    | 1       | 0.13-0.32       |
| Band neutrophil %                               | 0             | 1       | 0-0.1           |
| Plasmacytes %                                   | 0             | 1       | 0-0             |
| Erythroblast %                                  | 0             | 1       | 0-0             |

#### Biochemistry

|                              | Value | Unit   | Reference range |
|------------------------------|-------|--------|-----------------|
| Glucose                      | 4.8   | mmol/L | 4.1-5.6         |
| Urea                         | 4.1   | mmol/L | 2.1-7.1         |
| Potassium, K                 | 4.5   | mmol/L | 3.5-5           |
| Sodium, Na                   | 138   | mmol/L | 136-145         |
| Chloride, Cl                 | 100   | mmol/L | 98-106          |
| Calcium, Ca                  | 2.39  | mmol/L | 2.15-2.5        |
| Phosphate                    | 0.92  | mmol/L | 0.87-1.45       |
| Creatinine                   | 60    | μmol/L | 0-133           |
| Uric acid                    | 182   | μmol/L | 90-360          |
| Bilirubin, Total             | 11    | μmol/L | 5.1-17          |
| Bilirubin Direct             | 4     | μmol/L | 1.7-5.1         |
| Iron, Fe                     | 24.2  | μmol/L | 9-30.4          |
| Iron-binding capacity, total | 57.1  | μmol/L | 40.8-76.7       |

#### Blood gas analysis and hemoglobins

|                                        | Value | Unit   | Reference range |
|----------------------------------------|-------|--------|-----------------|
| Carbon dioxide content, arterial blood | 28    | mmol/L | 24-32           |

#### Protein and amino acid analysis

|                          | Value | Unit | Reference range |
|--------------------------|-------|------|-----------------|
| Proteins, total          | 73    | g/L  | 63-79           |
| SPE Albumin              | 44    | g/L  | 35-50           |
| Transferrin saturation % | 0.42  | 1    | 0.2-0.5         |
| Ferritin                 | 57    | μg/L | 10-200          |
| C-Reactive Protein, CRP  | 4     | mg/L | 0-5             |

#### Enzymes

|                                      | Value | Unit   | Reference range |
|--------------------------------------|-------|--------|-----------------|
| Alkaline Phosphatase, AP             | 0.81  | μkat/L | 0.71-1.67       |
| Aspartate Aminotransferase, AST, GOT | 0.28  | μkat/L | 0.17-1          |
| Alanine Aminotransferase, ALT, GPT   | 0.27  | μkat/L | 0.17-0.48       |
| Gamma-Glutamyltransferase, GGT       | 0.20  | μkat/L | 0-0.65          |
| Lactate Dehydrogenase, LD            | 2.43  | μkat/L | 1.7-3.2         |

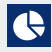

|                                                                                     | ICD | Prevalence | Prediction | Information | Description                                                                                             |
|-------------------------------------------------------------------------------------|-----|------------|------------|-------------|---------------------------------------------------------------------------------------------------------|
|    | D50 | 14.45%     | 39.60%     | 1.45        | <b>Iron deficiency anaemia</b>                                                                          |
|    | D47 | 18.50%     | 8.80%      | -1.07       | <b>Other neoplasms of uncertain or unknown behaviour of lymphoid, haematopoietic and related tissue</b> |
|    | D75 | 6.64%      | 8.80%      | 0.41        | <b>Other diseases of blood and blood-forming organs</b>                                                 |
|    | D68 | 1.20%      | 7.40%      | 2.62        | <b>Other coagulation defects</b>                                                                        |
|    | D69 | 9.02%      | 6.60%      | -0.45       | <b>Purpura and other haemorrhagic conditions</b>                                                        |
|   | D70 | 0.68%      | 3.80%      | 2.48        | <b>Agranulocytosis</b>                                                                                  |
|  | C92 | 7.01%      | 2.60%      | -1.43       | <b>Myeloid leukaemia</b>                                                                                |
|  | C96 | 0.57%      | 2.60%      | 2.19        | <b>Other and unspecified malignant neoplasms of lymphoid, haematopoietic and related tissue</b>         |
|  | D72 | 0.85%      | 2.40%      | 1.50        | <b>Other disorders of white blood cells</b>                                                             |
|  | D46 | 5.56%      | 2.00%      | -1.47       | <b>Myelodysplastic syndromes</b>                                                                        |

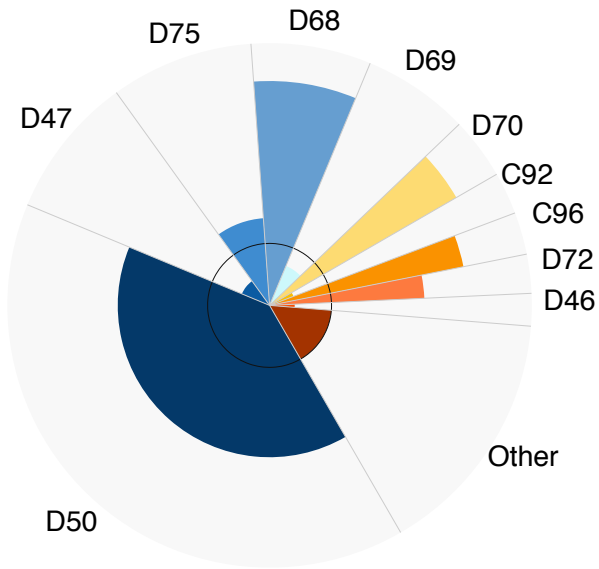

## Smart Blood Analytics report #610

**i** #72 primer 5

Male,  

### **🔹** Blood Parameters

Lab Test Date: /

#### Hematology

|                                                 |   | Value | Unit       | Reference range |
|-------------------------------------------------|---|-------|------------|-----------------|
| Leukocyte count, WBC                            | H | 20.93 | 1E9/L      | 4-10            |
| Neutrophils count                               | H | 13.60 | 1E9/L      | 1.5-7.4         |
| Lymphocyte count                                |   | 2.93  | 1E9/L      | 1-3.4           |
| Monocyte count                                  | H | 3.14  | 1E9/L      | 0.21-0.92       |
| Eosinophils count                               | L | 0     | 1E9/L      | 0.02-0.67       |
| Basophils count                                 |   | 0.08  | 1E9/L      | 0-0.13          |
| Immature granulocytes count                     | H | 1.26  | 1E9/L      | 0-0             |
| Erythroblasts count                             | H | 5.87  | 1E9/L      | 0-0             |
| Neutrophils %                                   |   | 0.63  | 1          | 0.4-0.7         |
| Lymphocyte %                                    | L | 0.14  | 1          | 0.22-0.44       |
| Monocyte %                                      | H | 0.15  | 1          | 0.04-0.11       |
| Eosinophils %                                   |   | 0     | 1          | 0-0.08          |
| Basophils %                                     |   | 0     | 1          | 0-0.03          |
| Immature Granulocytes %                         | H | 0.129 | 1          | 0-0.01          |
| Erythroblast %                                  | H | 0.27  | 1          | 0-0             |
| Hemoglobin                                      | L | 78    | g/L        | 130-170         |
| Hematocrit                                      | L | 0.235 | 1          | 0.4-0.5         |
| Erythrocyte count, RBC                          | L | 2.44  | 1E12/L     | 4.5-5.9         |
| Mean Corpuscular Volume, MCV                    |   | 96.3  | fL         | 83-101          |
| Mean Corpuscular Hemoglobin, MCH                |   | 32    | pg/cell    | 27-32           |
| Mean Corpuscular Hemoglobin Concentration, MCHC |   | 332   | g/L        | 315-345         |
| Erythrocyte Distribution Width, RDW             | H | 0.216 | 1          | 0.116-0.14      |
| Thrombocytes count, Platelet count              | L | 23    | 1E9/L      | 150-410         |
| Blast cells %                                   |   | 0     | 1          | 0-0.05          |
| Promyelocyte %                                  | L | 0     | 1          | 0.01-0.08       |
| Myelocytes %                                    | H | 0.02  | 1          | 0-0             |
| Metamyelocytes %                                | L | 0.04  | 1          | 0.13-0.32       |
| Band neutrophil %                               |   | 0.02  | 1          | 0-0.1           |
| Promonocytes %                                  |   | 0     | 1          | 0-0             |
| Plasmacytes %                                   |   | 0     | 1          | 0-0             |
| Schistocyte, fragmented RBC /1000 RBC           | H | 0.073 | /1000 Erci | -               |

#### Biochemistry

|                  |   | Value | Unit   | Reference range |
|------------------|---|-------|--------|-----------------|
| Glucose          | H | 9.4   | mmol/L | 4.1-5.6         |
| Urea             | H | 14.7  | mmol/L | 2.1-7.1         |
| Potassium, K     |   | 3.80  | mmol/L | 3.5-5           |
| Sodium, Na       |   | 144   | mmol/L | 136-145         |
| Chloride, Cl     |   | 102   | mmol/L | 98-106          |
| Calcium, Ca      |   | 2.31  | mmol/L | 2.15-2.5        |
| Phosphate        | H | 1.59  | mmol/L | 0.87-1.45       |
| Magnesium, Mg    |   | 0.84  | mmol/L | 0.74-1.23       |
| Creatinine       |   | 124   | µmol/L | 0-133           |
| Uric acid        |   | 429   | µmol/L | 150-480         |
| Bilirubin, Total | H | 18    | µmol/L | 5.1-17          |
| Bilirubin Direct | H | 8     | µmol/L | 1.7-5.1         |
| Iron, Fe         |   | 12.2  | µmol/L | 11.6-31.3       |

#### Blood gas analysis and hemoglobins

|                                        |   | Value | Unit   | Reference range |
|----------------------------------------|---|-------|--------|-----------------|
| Carbon dioxide content, arterial blood | L | 0.33  | mmol/L | 24-32           |

#### Protein and amino acid analysis

|                         |   | Value | Unit | Reference range |
|-------------------------|---|-------|------|-----------------|
| Proteins, total         | L | 59    | g/L  | 63-79           |
| SPE Albumin             | H | 56    | g/L  | 35-50           |
| C-Reactive Protein, CRP | H | 8     | mg/L | 0-5             |

#### Enzymes

|                                      |   | Value | Unit   | Reference range |
|--------------------------------------|---|-------|--------|-----------------|
| Alkaline Phosphatase, AP             |   | 0.94  | µkat/L | 0.9-2.18        |
| Aspartate Aminotransferase, AST, GOT |   | 0.49  | µkat/L | 0.17-1          |
| Alanine Aminotransferase, ALT, GPT   |   | 0.51  | µkat/L | 0.22-0.68       |
| Gamma-Glutamyltransferase, GGT       |   | 0.65  | µkat/L | 0-0.94          |
| Lactate Dehydrogenase, LD            | H | 4.76  | µkat/L | 1.7-3.2         |

### Hormones and growth factors

|                                   | Value                                       | Unit | Reference range |
|-----------------------------------|---------------------------------------------|------|-----------------|
| NT-Pro B-Type Natriuretic Peptide | <span style="color: orange;">H</span> 15386 | µg/L | 0-35            |
| Procalcitonin                     | <span style="color: orange;">H</span> 0.18  | µg/L | 0-0.15          |

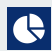

## Smart Blood Analytics Report

Model used: Hematology (CT181)

Report Date: 2017/05/30

|                                           | ICD | Prevalence | Prediction | Information | Description                                                                                             |
|-------------------------------------------|-----|------------|------------|-------------|---------------------------------------------------------------------------------------------------------|
| <span style="color: darkblue;">■</span>   | C92 | 7.01%      | 27.80%     | 1.99        | <b>Myeloid leukaemia</b>                                                                                |
| <span style="color: blue;">■</span>       | C90 | 8.99%      | 9.00%      | 0.00        | <b>Multiple myeloma and malignant plasma cell neoplasms</b>                                             |
| <span style="color: lightblue;">■</span>  | D47 | 18.50%     | 8.00%      | -1.21       | <b>Other neoplasms of uncertain or unknown behaviour of lymphoid, haematopoietic and related tissue</b> |
| <span style="color: cyan;">■</span>       | D46 | 5.56%      | 7.80%      | 0.49        | <b>Myelodysplastic syndromes</b>                                                                        |
| <span style="color: lightcyan;">■</span>  | C83 | 2.02%      | 6.80%      | 1.75        | <b>Diffuse non-Hodgkin lymphoma</b>                                                                     |
| <span style="color: yellow;">■</span>     | C91 | 8.45%      | 4.60%      | -0.88       | <b>Lymphoid leukaemia</b>                                                                               |
| <span style="color: gold;">■</span>       | M31 | 0.49%      | 4.60%      | 3.24        | <b>Other necrotising vasculopathies</b>                                                                 |
| <span style="color: orange;">■</span>     | C85 | 1.09%      | 4.40%      | 2.01        | <b>Other and unspecified types of non-Hodgkin lymphoma</b>                                              |
| <span style="color: darkorange;">■</span> | D75 | 6.64%      | 3.80%      | -0.81       | <b>Other diseases of blood and blood-forming organs</b>                                                 |
| <span style="color: red;">■</span>        | D69 | 9.02%      | 3.80%      | -1.25       | <b>Purpura and other haemorrhagic conditions</b>                                                        |

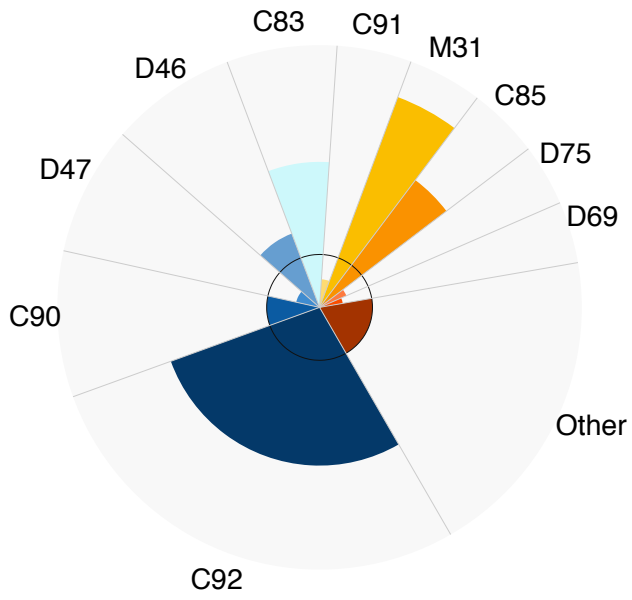



## Smart Blood Analytics report #611

**i** #73 primer 6

Female,

### **🔹** Blood Parameters

Lab Test Date: /

#### Hematology

|                                                 | Value          | Unit    | Reference range |
|-------------------------------------------------|----------------|---------|-----------------|
| Leukocyte count, WBC                            | 5.3            | 1E9/L   | 4-10            |
| Neutrophils count                               | 4.08           | 1E9/L   | 1.5-7.4         |
| Lymphocyte count                                | <b>L</b> 0.85  | 1E9/L   | 1-3.4           |
| Monocyte count                                  | 0.26           | 1E9/L   | 0.21-0.92       |
| Eosinophils count                               | 0.11           | 1E9/L   | 0.02-0.67       |
| Basophils count                                 | 0.03           | 1E9/L   | 0-0.13          |
| Immature granulocytes count                     | 0              | 1E9/L   | 0-0             |
| Erythroblasts count                             | <b>H</b> 0.01  | 1E9/L   | 0-0             |
| Neutrophils %                                   | <b>H</b> 0.77  | 1       | 0.4-0.7         |
| Lymphocyte %                                    | <b>L</b> 0.16  | 1       | 0.22-0.44       |
| Monocyte %                                      | 0.05           | 1       | 0.04-0.11       |
| Eosinophils %                                   | 0.02           | 1       | 0-0.08          |
| Basophils %                                     | 0              | 1       | 0-0.03          |
| Immature Granulocytes %                         | 0.004          | 1       | 0-0.01          |
| Erythroblast %                                  | 0              | 1       | 0-0             |
| Hemoglobin                                      | <b>L</b> 73    | g/L     | 120-150         |
| Hematocrit                                      | <b>L</b> 0.272 | 1       | 0.36-0.46       |
| Erythrocyte count, RBC                          | 4.28           | 1E12/L  | 4-5.2           |
| Mean Corpuscular Volume, MCV                    | <b>L</b> 63.6  | fL      | 83-101          |
| Mean Corpuscular Hemoglobin, MCH                | <b>L</b> 17.1  | pg/cell | 27-32           |
| Mean Corpuscular Hemoglobin Concentration, MCHC | <b>L</b> 268   | g/L     | 315-345         |
| Erythrocyte Distribution Width, RDW             | <b>H</b> 0.195 | 1       | 0.116-0.14      |
| Reticulocytes count, urgent automated           | 47.5           | 1E9/L   | 20-100          |
| Reticulocytes %                                 | 0.0111         | 1       | 0.005-0.025     |
| Hypochromic red cells %, Hypo-He                | <b>H</b> 0.563 | 1       | 0-0.027         |
| Thrombocytes count, Platelet count              | 339            | 1E9/L   | 150-410         |
| Mean Platelet Volume, MPV                       | 10.1           | fL      | 9.2-12.9        |
| Platelet distribution width, PDW                | 13.2           |         | 11-16.9         |
| Blast cells %                                   | <b>H</b> 0.28  | 1       | 0-0.05          |
| Promonocytes %                                  | 0              | 1       | 0-0             |
| Myelocytes %                                    | 0              | 1       | 0-0             |

#### Blood gas analysis and hemoglobins

|                                            | Value         | Unit   | Reference range |
|--------------------------------------------|---------------|--------|-----------------|
| Reticulocyte hemoglobin equivalent, Ret-He | <b>L</b> 17.7 | pg     | 28-35           |
| Carbon dioxide content, arterial blood     | 27            | mmol/L | 24-32           |

#### Biochemistry

|                              | Value | Unit   | Reference range |
|------------------------------|-------|--------|-----------------|
| Glucose                      | 5.5   | mmol/L | 4.1-5.6         |
| Urea                         | 3.9   | mmol/L | 2.1-7.1         |
| Potassium, K                 | 4.50  | mmol/L | 3.5-5           |
| Sodium, Na                   | 140   | mmol/L | 136-145         |
| Chloride, Cl                 | 106   | mmol/L | 98-106          |
| Calcium, Ca                  | 2.23  | mmol/L | 2.15-2.5        |
| Phosphate                    | 1.14  | mmol/L | 0.87-1.45       |
| Creatinine                   | 46    | µmol/L | 0-133           |
| Uric acid                    | 210   | µmol/L | 90-360          |
| Bilirubin, Total             | 6     | µmol/L | 5.1-17          |
| Bilirubin Direct             | 2     | µmol/L | 1.7-5.1         |
| Iron, Fe                     | 28.1  | µmol/L | 9-30.4          |
| Iron-binding capacity, total | 63.8  | µmol/L | 40.8-76.7       |

#### Protein and amino acid analysis

|                          | Value      | Unit | Reference range |
|--------------------------|------------|------|-----------------|
| Proteins, total          | 76         | g/L  | 63-79           |
| SPE Albumin              | 45         | g/L  | 35-50           |
| Transferrin saturation % | 0.44       | 1    | 0.2-0.5         |
| Ferritin                 | <b>L</b> 3 | µg/L | 10-200          |
| C-Reactive Protein, CRP  | 4          | mg/L | 0-5             |

#### Enzymes

|                                    | Value | Unit   | Reference range |
|------------------------------------|-------|--------|-----------------|
| Alkaline Phosphatase, AP           | 0.72  | µkat/L | 0.71-1.67       |
| Alanine Aminotransferase, ALT, GPT | 0.27  | µkat/L | 0.17-0.48       |
| Gamma-Glutamyltransferase, GGT     | 0.11  | µkat/L | 0-0.65          |
| Lactate Dehydrogenase, LD          | 2.47  | µkat/L | 1.7-3.2         |

|                   |                                                                                           |     |           |
|-------------------|-------------------------------------------------------------------------------------------|-----|-----------|
| Metamyelocytes %  | <span style="background-color: orange; border: 1px solid black; padding: 0 2px;">L</span> | 0 1 | 0.13-0.32 |
| Band neutrophil % |                                                                                           | 0 1 | 0-0.1     |
| Plasmacytes %     |                                                                                           | 0 1 | 0-0       |


Smart Blood Analytics Report

Model used: Hematology  
(CT181)

Report Date: 2017/05/30

|                                                                                     | ICD | Prevalence | Prediction | Information | Description                                                                                             |
|-------------------------------------------------------------------------------------|-----|------------|------------|-------------|---------------------------------------------------------------------------------------------------------|
|    | D50 | 14.45%     | 78.80%     | 2.45        | <b>Iron deficiency anaemia</b>                                                                          |
|    | D56 | 0.39%      | 5.20%      | 3.74        | <b>Thalassaemia</b>                                                                                     |
|    | D64 | 2.65%      | 3.60%      | 0.44        | <b>Other anaemias</b>                                                                                   |
|    | D47 | 18.50%     | 3.00%      | -2.62       | <b>Other neoplasms of uncertain or unknown behaviour of lymphoid, haematopoietic and related tissue</b> |
|   | D75 | 6.64%      | 2.40%      | -1.47       | <b>Other diseases of blood and blood-forming organs</b>                                                 |
|  | D46 | 5.56%      | 1.60%      | -1.80       | <b>Myelodysplastic syndromes</b>                                                                        |
|  | D68 | 1.20%      | 1.20%      | -0.00       | <b>Other coagulation defects</b>                                                                        |
|  | D69 | 9.02%      | 1.00%      | -3.17       | <b>Purpura and other haemorrhagic conditions</b>                                                        |
|  | C92 | 7.01%      | 0.80%      | -3.13       | <b>Myeloid leukaemia</b>                                                                                |
|  | D53 | 1.14%      | 0.60%      | -0.93       | <b>Other nutritional anaemias</b>                                                                       |

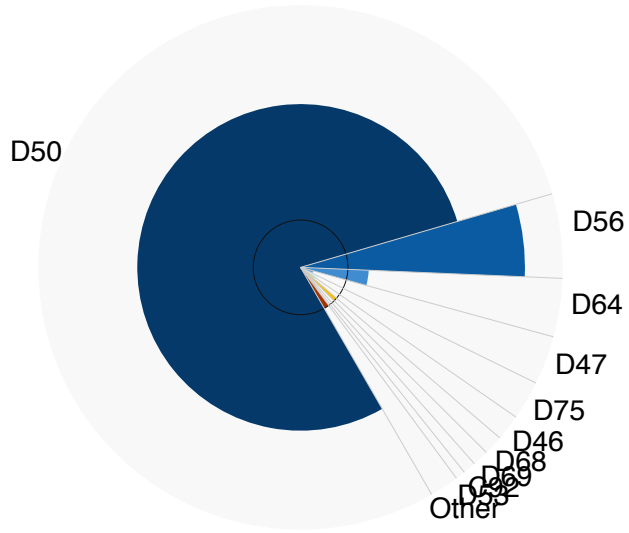

## Smart Blood Analytics report #612

**i** #74 primer 7

Male,  

### Blood Parameters

Lab Test Date: /

#### Hematology

|                                                 | Value          | Unit    | Reference range |
|-------------------------------------------------|----------------|---------|-----------------|
| Leukocyte count, WBC                            | 8.94           | 1E9/L   | 4-10            |
| Neutrophils count                               | 6.44           | 1E9/L   | 1.5-7.4         |
| Lymphocyte count                                | 1.25           | 1E9/L   | 1-3.4           |
| Monocyte count                                  | <b>L</b> 0.09  | 1E9/L   | 0.21-0.92       |
| Eosinophils count                               | <b>H</b> 1.16  | 1E9/L   | 0.02-0.67       |
| Basophils count                                 | <b>H</b> 0.16  | 1E9/L   | 0-0.13          |
| Immature granulocytes count                     | 0              | 1E9/L   | 0-0             |
| Erythroblasts count                             | 0              | 1E9/L   | 0-0             |
| Neutrophils %                                   | <b>H</b> 0.72  | 1       | 0.4-0.7         |
| Lymphocyte %                                    | <b>L</b> 0.14  | 1       | 0.22-0.44       |
| Monocyte %                                      | <b>L</b> 0.01  | 1       | 0.04-0.11       |
| Eosinophils %                                   | <b>H</b> 0.13  | 1       | 0-0.08          |
| Basophils %                                     | 0              | 1       | 0-0.03          |
| Immature Granulocytes %                         | 0.002          | 1       | 0-0.01          |
| Erythroblast %                                  | 0              | 1       | 0-0             |
| Hemoglobin                                      | <b>H</b> 171   | g/L     | 130-170         |
| Hematocrit                                      | <b>H</b> 0.503 | 1       | 0.4-0.5         |
| Erythrocyte count, RBC                          | 5.83           | 1E12/L  | 4.5-5.9         |
| Mean Corpuscular Volume, MCV                    | 86.3           | fL      | 83-101          |
| Mean Corpuscular Hemoglobin, MCH                | 29.3           | pg/cell | 27-32           |
| Mean Corpuscular Hemoglobin Concentration, MCHC | 340            | g/L     | 315-345         |
| Erythrocyte Distribution Width, RDW             | <b>H</b> 0.141 | 1       | 0.116-0.14      |
| Reticulocytes count, urgent automated           | 84             | 1E9/L   | 20-100          |
| Reticulocytes %                                 | 0.0144         | 1       | 0.005-0.025     |
| Hypochromic red cells %, Hypo-He                | 0.0001         | 1       | 0-0.027         |
| Thrombocytes count, Platelet count              | <b>H</b> 817   | 1E9/L   | 150-410         |
| Mean Platelet Volume, MPV                       | <b>L</b> 9.1   | fL      | 9.4-12.2        |
| Platelet distribution width, PDW                | <b>L</b> 10.4  |         | 11-16.9         |
| Blast cells %                                   | 0              | 1       | 0-0.05          |
| Promyelocyte %                                  | <b>L</b> 0     | 1       | 0.01-0.08       |
| Myelocytes %                                    | 0              | 1       | 0-0             |

#### Blood gas analysis and hemoglobins

|                                            | Value | Unit   | Reference range |
|--------------------------------------------|-------|--------|-----------------|
| Reticulocyte hemoglobin equivalent, Ret-He | 31.5  | pg     | 28-35           |
| Carbon dioxide content, arterial blood     | 28    | mmol/L | 24-32           |

#### Biochemistry

|                              | Value        | Unit   | Reference range |
|------------------------------|--------------|--------|-----------------|
| Glucose                      | 4.1          | mmol/L | 4.1-5.6         |
| Urea                         | 5.6          | mmol/L | 2.1-7.1         |
| Potassium, K                 | <b>H</b> 5.1 | mmol/L | 3.5-5           |
| Sodium, Na                   | 144          | mmol/L | 136-145         |
| Chloride, Cl                 | 101          | mmol/L | 98-106          |
| Calcium, Ca                  | 2.24         | mmol/L | 2.15-2.5        |
| Phosphate                    | 0.87         | mmol/L | 0.87-1.45       |
| Creatinine                   | 65           | µmol/L | 0-133           |
| Uric acid                    | 313          | µmol/L | 150-480         |
| Bilirubin, Total             | <b>H</b> 22  | µmol/L | 5.1-17          |
| Bilirubin Direct             | <b>H</b> 6   | µmol/L | 1.7-5.1         |
| Iron, Fe                     | 15.1         | µmol/L | 11.6-31.3       |
| Iron-binding capacity, total | 57.5         | µmol/L | 40.8-76.7       |

#### Protein and amino acid analysis

|                          | Value | Unit | Reference range |
|--------------------------|-------|------|-----------------|
| Proteins, total          | 76    | g/L  | 63-79           |
| SPE Albumin              | 47    | g/L  | 35-50           |
| Transferrin saturation % | 0.263 | 1    | 0.2-0.5         |
| Ferritin                 | 131   | µg/L | 30-300          |
| C-Reactive Protein, CRP  | 4     | mg/L | 0-5             |

#### Enzymes

|                                      | Value | Unit   | Reference range |
|--------------------------------------|-------|--------|-----------------|
| Alkaline Phosphatase, AP             | 0.92  | µkat/L | 0.9-2.18        |
| Aspartate Aminotransferase, AST, GOT | 0.38  | µkat/L | 0.17-1          |
| Alanine Aminotransferase, ALT, GPT   | 0.43  | µkat/L | 0.22-0.68       |

|                   |                                       |     |           |                                |                                                   |         |
|-------------------|---------------------------------------|-----|-----------|--------------------------------|---------------------------------------------------|---------|
| Metamyelocytes %  | <span style="color: orange;">L</span> | 0 1 | 0.13-0.32 | Gamma-Glutamyltransferase, GGT | 0.29 µkat/L                                       | 0-0.94  |
| Band neutrophil % |                                       | 0 1 | 0-0.1     | Lactate Dehydrogenase, LD      | <span style="color: orange;">H</span> 4.07 µkat/L | 1.7-3.2 |
| Promonocytes %    |                                       | 0 1 | 0-0       |                                |                                                   |         |
| Plasmacytes %     |                                       | 0 1 | 0-0       |                                |                                                   |         |

|                                                                                                                       |                                |                         |
|-----------------------------------------------------------------------------------------------------------------------|--------------------------------|-------------------------|
|  <b>Smart Blood Analytics Report</b> | Model used: Hematology (CT181) | Report Date: 2017/05/30 |
|-----------------------------------------------------------------------------------------------------------------------|--------------------------------|-------------------------|

|                                           | ICD | Prevalence | Prediction | Information | Description                                                                                             |
|-------------------------------------------|-----|------------|------------|-------------|---------------------------------------------------------------------------------------------------------|
| <span style="color: darkblue;">■</span>   | D47 | 18.50%     | 33.20%     | 0.84        | <b>Other neoplasms of uncertain or unknown behaviour of lymphoid, haematopoietic and related tissue</b> |
| <span style="color: blue;">■</span>       | D45 | 2.47%      | 27.60%     | 3.48        | <b>Polycythaemia vera</b>                                                                               |
| <span style="color: lightblue;">■</span>  | D75 | 6.64%      | 18.00%     | 1.44        | <b>Other diseases of blood and blood-forming organs</b>                                                 |
| <span style="color: steelblue;">■</span>  | D72 | 0.85%      | 3.40%      | 2.00        | <b>Other disorders of white blood cells</b>                                                             |
| <span style="color: cyan;">■</span>       | C96 | 0.57%      | 3.00%      | 2.39        | <b>Other and unspecified malignant neoplasms of lymphoid, haematopoietic and related tissue</b>         |
| <span style="color: yellow;">■</span>     | D69 | 9.02%      | 2.80%      | -1.69       | <b>Purpura and other haemorrhagic conditions</b>                                                        |
| <span style="color: gold;">■</span>       | D50 | 14.45%     | 2.40%      | -2.59       | <b>Iron deficiency anaemia</b>                                                                          |
| <span style="color: orange;">■</span>     | C91 | 8.45%      | 1.80%      | -2.23       | <b>Lymphoid leukaemia</b>                                                                               |
| <span style="color: darkorange;">■</span> | D66 | 0.52%      | 1.60%      | 1.61        | <b>Hereditary factor VIII deficiency</b>                                                                |
| <span style="color: red;">■</span>        | C92 | 7.01%      | 1.60%      | -2.13       | <b>Myeloid leukaemia</b>                                                                                |

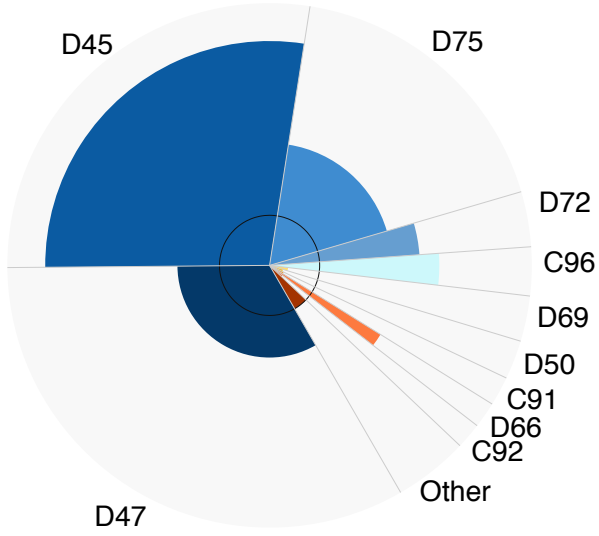

## Smart Blood Analytics report #613

**i** #75 primer 8

Female,  

### Blood Parameters

Lab Test Date: /

#### Hematology

|                                                 | Value          | Unit    | Reference range |
|-------------------------------------------------|----------------|---------|-----------------|
| Leukocyte count, WBC                            | 4.56           | 1E9/L   | 4-10            |
| Neutrophils count                               | 2.60           | 1E9/L   | 1.5-7.4         |
| Lymphocyte count                                | 1.19           | 1E9/L   | 1-3.4           |
| Monocyte count                                  | 0.78           | 1E9/L   | 0.21-0.92       |
| Eosinophils count                               | <b>L</b> 0     | 1E9/L   | 0.02-0.67       |
| Basophils count                                 | 0.01           | 1E9/L   | 0-0.13          |
| Immature granulocytes count                     | 0              | 1E9/L   | 0-0             |
| Erythroblasts count                             | 0              | 1E9/L   | 0-0             |
| Neutrophils %                                   | 0.57           | 1       | 0.4-0.7         |
| Lymphocyte %                                    | 0.26           | 1       | 0.22-0.44       |
| Monocyte %                                      | <b>H</b> 0.17  | 1       | 0.04-0.11       |
| Eosinophils %                                   | 0              | 1       | 0-0.08          |
| Basophils %                                     | 0              | 1       | 0-0.03          |
| Immature Granulocytes %                         | 0.004          | 1       | 0-0.01          |
| Erythroblast %                                  | 0              | 1       | 0-0             |
| Hemoglobin                                      | <b>L</b> 74    | g/L     | 120-150         |
| Hematocrit                                      | <b>L</b> 0.231 | 1       | 0.36-0.46       |
| Erythrocyte count, RBC                          | <b>L</b> 2.27  | 1E12/L  | 4-5.2           |
| Mean Corpuscular Volume, MCV                    | <b>H</b> 101.8 | fL      | 83-101          |
| Mean Corpuscular Hemoglobin, MCH                | <b>H</b> 32.6  | pg/cell | 27-32           |
| Mean Corpuscular Hemoglobin Concentration, MCHC | 320            | g/L     | 315-345         |
| Erythrocyte Distribution Width, RDW             | <b>H</b> 0.185 | 1       | 0.116-0.14      |
| Reticulocytes count, urgent automated           | <b>H</b> 109   | 1E9/L   | 20-100          |
| Reticulocytes %                                 | <b>H</b> 0.048 | 1       | 0.005-0.025     |
| Hypochromic red cells %, Hypo-He                | <b>H</b> 0.035 | 1       | 0-0.027         |
| Thrombocytes count, Platelet count              | <b>L</b> 88    | 1E9/L   | 150-410         |
| Mean Platelet Volume, MPV                       | 12.1           | fL      | 9.2-12.9        |
| Platelet distribution width, PDW                | 12.2           |         | 11-16.9         |
| Blast cells %                                   | 0              | 1       | 0-0.05          |
| Promonocytes %                                  | 0              | 1       | 0-0             |
| Myelocytes %                                    | 0              | 1       | 0-0             |

#### Blood gas analysis and hemoglobins

|                                            | Value | Unit   | Reference range |
|--------------------------------------------|-------|--------|-----------------|
| Reticulocyte hemoglobin equivalent, Ret-He | 28    | pg     | 28-35           |
| Carbon dioxide content, arterial blood     | 26    | mmol/L | 24-32           |

#### Biochemistry

|                              | Value        | Unit   | Reference range |
|------------------------------|--------------|--------|-----------------|
| Glucose                      | 4.2          | mmol/L | 4.1-5.6         |
| Urea                         | 4.3          | mmol/L | 2.1-7.1         |
| Potassium, K                 | 4.3          | mmol/L | 3.5-5           |
| Sodium, Na                   | 140          | mmol/L | 136-145         |
| Chloride, Cl                 | <b>H</b> 107 | mmol/L | 98-106          |
| Calcium, Ca                  | 2.23         | mmol/L | 2.15-2.5        |
| Calcium corrected, Ca        | 2.23         | mmol/L | 2.1-2.6         |
| Phosphate                    | 1.22         | mmol/L | 0.87-1.45       |
| Creatinine                   | 39           | µmol/L | 0-133           |
| Uric acid                    | 159          | µmol/L | 90-360          |
| Bilirubin, Total             | 12           | µmol/L | 5.1-17          |
| Bilirubin Direct             | 4            | µmol/L | 1.7-5.1         |
| Iron, Fe                     | <b>L</b> 5   | µmol/L | 9-30.4          |
| Iron-binding capacity, total | 63           | µmol/L | 40.8-76.7       |

#### Protein and amino acid analysis

|                                         | Value          | Unit   | Reference range |
|-----------------------------------------|----------------|--------|-----------------|
| Proteins, total                         | <b>L</b> 62    | g/L    | 63-79           |
| SPE Albumin                             | 40             | g/L    | 35-50           |
| Transferrin saturation %                | <b>L</b> 0.079 | 1      | 0.2-0.5         |
| Iron Binding Capacity unsaturated, UIBC | <b>H</b> 58.0  | µmol/L | 13-56           |
| Ferritin                                | 13             | µg/L   | 10-200          |
| C-Reactive Protein, CRP                 | <b>H</b> 12    | mg/L   | 0-5             |

#### Enzymes

|                             | Value | Unit   | Reference range |
|-----------------------------|-------|--------|-----------------|
| Alkaline Phosphatase, AP    | 1.20  | µkat/L | 0.71-1.67       |
| Aspartate Aminotransferase, | 0.82  | µkat/L | 0.17-1          |

|                   |                                       |     |           |                                    |                                       |                       |
|-------------------|---------------------------------------|-----|-----------|------------------------------------|---------------------------------------|-----------------------|
| Metamyelocytes %  | <span style="color: orange;">L</span> | 0 1 | 0.13-0.32 | AST, GOT                           |                                       |                       |
| Band neutrophil % |                                       | 0 1 | 0-0.1     | Alanine Aminotransferase, ALT, GPT | <span style="color: orange;">H</span> | 0.55 µkat/L 0.17-0.48 |
| Plasmacytes %     |                                       | 0 1 | 0-0       | Gamma-Glutamyltransferase, GGT     |                                       | 0.16 µkat/L 0-0.65    |
|                   |                                       |     |           | Lactate Dehydrogenase, LD          | <span style="color: orange;">H</span> | 17.62 µkat/L 1.7-3.2  |

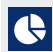

## Smart Blood Analytics Report

Model used: Hematology (CT181)

Report Date: 2017/05/30

|                                           | ICD | Prevalence | Prediction | Information | Description                                                 |
|-------------------------------------------|-----|------------|------------|-------------|-------------------------------------------------------------|
| <span style="color: darkblue;">■</span>   | D50 | 14.45%     | 13.40%     | -0.11       | <b>Iron deficiency anaemia</b>                              |
| <span style="color: blue;">■</span>       | D69 | 9.02%      | 12.80%     | 0.50        | <b>Purpura and other haemorrhagic conditions</b>            |
| <span style="color: lightblue;">■</span>  | D46 | 5.56%      | 10.00%     | 0.85        | <b>Myelodysplastic syndromes</b>                            |
| <span style="color: cyan;">■</span>       | D64 | 2.65%      | 8.40%      | 1.66        | <b>Other anaemias</b>                                       |
| <span style="color: lightcyan;">■</span>  | D75 | 6.64%      | 8.20%      | 0.30        | <b>Other diseases of blood and blood-forming organs</b>     |
| <span style="color: yellow;">■</span>     | C92 | 7.01%      | 7.80%      | 0.15        | <b>Myeloid leukaemia</b>                                    |
| <span style="color: orange;">■</span>     | C90 | 8.99%      | 6.00%      | -0.58       | <b>Multiple myeloma and malignant plasma cell neoplasms</b> |
| <span style="color: gold;">■</span>       | D53 | 1.14%      | 4.60%      | 2.01        | <b>Other nutritional anaemias</b>                           |
| <span style="color: darkorange;">■</span> | C83 | 2.02%      | 4.40%      | 1.12        | <b>Diffuse non-Hodgkin lymphoma</b>                         |
| <span style="color: red;">■</span>        | D59 | 0.95%      | 3.40%      | 1.84        | <b>Acquired haemolytic anaemia</b>                          |



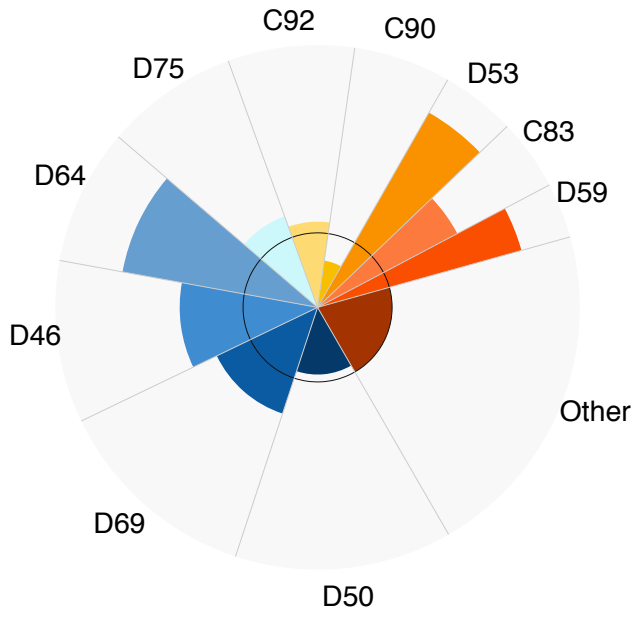

## Smart Blood Analytics report #614

**i** #76 primer 9

Female,  

### **🔹** Blood Parameters

Lab Test Date: /

#### Hematology

|                                                 | Value          | Unit    | Reference range |
|-------------------------------------------------|----------------|---------|-----------------|
| Leukocyte count, WBC                            | 4.58           | 1E9/L   | 4-10            |
| Neutrophils count                               | 2.56           | 1E9/L   | 1.5-7.4         |
| Lymphocyte count                                | 1.74           | 1E9/L   | 1-3.4           |
| Monocyte count                                  | <b>L</b> 0.14  | 1E9/L   | 0.21-0.92       |
| Eosinophils count                               | 0.14           | 1E9/L   | 0.02-0.67       |
| Basophils count                                 | 0.01           | 1E9/L   | 0-0.13          |
| Immature granulocytes count                     | 0              | 1E9/L   | 0-0             |
| Erythroblasts count                             | <b>H</b> 0.01  | 1E9/L   | 0-0             |
| Neutrophils %                                   | 0.56           | 1       | 0.4-0.7         |
| Lymphocyte %                                    | 0.38           | 1       | 0.22-0.44       |
| Monocyte %                                      | <b>L</b> 0.03  | 1       | 0.04-0.11       |
| Eosinophils %                                   | 0.03           | 1       | 0-0.08          |
| Basophils %                                     | 0              | 1       | 0-0.03          |
| Immature Granulocytes %                         | <b>H</b> 0.013 | 1       | 0-0.01          |
| Erythroblast %                                  | 0              | 1       | 0-0             |
| Hemoglobin                                      | <b>L</b> 65    | g/L     | 120-150         |
| Hematocrit                                      | <b>L</b> 0.177 | 1       | 0.36-0.46       |
| Erythrocyte count, RBC                          | <b>L</b> 1.58  | 1E12/L  | 4-5.2           |
| Mean Corpuscular Volume, MCV                    | <b>H</b> 112   | fL      | 83-101          |
| Mean Corpuscular Hemoglobin, MCH                | <b>H</b> 41.1  | pg/cell | 27-32           |
| Mean Corpuscular Hemoglobin Concentration, MCHC | <b>H</b> 367   | g/L     | 315-345         |
| Erythrocyte Distribution Width, RDW             | <b>H</b> 0.159 | 1       | 0.116-0.14      |
| Reticulocytes count, urgent automated           | 32.1           | 1E9/L   | 20-100          |
| Reticulocytes %                                 | 0.0203         | 1       | 0.005-0.025     |
| Hypochromic red cells %, Hypo-He                | <b>H</b> 0.029 | 1       | 0-0.027         |
| Thrombocytes count, Platelet count              | <b>L</b> 59    | 1E9/L   | 150-410         |
| Mean Platelet Volume, MPV                       | 9.7            | fL      | 9.2-12.9        |
| Platelet distribution width, PDW                | 12.7           |         | 11-16.9         |
| Blast cells %                                   | 0              | 1       | 0-0.05          |
| Promonocytes %                                  | 0              | 1       | 0-0             |
| Myelocytes %                                    | 0              | 1       | 0-0             |

#### Blood gas analysis and hemoglobins

|                                            | Value         | Unit   | Reference range |
|--------------------------------------------|---------------|--------|-----------------|
| Reticulocyte hemoglobin equivalent, Ret-He | <b>H</b> 39.1 | pg     | 28-35           |
| Carbon dioxide content, arterial blood     | 30            | mmol/L | 24-32           |

#### Biochemistry

|                              | Value         | Unit   | Reference range |
|------------------------------|---------------|--------|-----------------|
| Glucose                      | <b>H</b> 5.9  | mmol/L | 4.1-5.6         |
| Urea                         | <b>H</b> 7.8  | mmol/L | 2.1-7.1         |
| Potassium, K                 | 4.2           | mmol/L | 3.5-5           |
| Sodium, Na                   | <b>L</b> 135  | mmol/L | 136-145         |
| Chloride, Cl                 | 99            | mmol/L | 98-106          |
| Calcium, Ca                  | 2.16          | mmol/L | 2.15-2.5        |
| Phosphate                    | 1             | mmol/L | 0.87-1.45       |
| Creatinine                   | 76            | µmol/L | 0-133           |
| Uric acid                    | 288           | µmol/L | 90-360          |
| Bilirubin, Total             | <b>H</b> 21   | µmol/L | 5.1-17          |
| Bilirubin Direct             | <b>H</b> 8    | µmol/L | 1.7-5.1         |
| Iron, Fe                     | <b>H</b> 37.4 | µmol/L | 9-30.4          |
| Iron-binding capacity, total | 47.8          | µmol/L | 40.8-76.7       |

#### Protein and amino acid analysis

|                          | Value          | Unit | Reference range |
|--------------------------|----------------|------|-----------------|
| Proteins, total          | 69             | g/L  | 63-79           |
| SPE Albumin              | 37             | g/L  | 35-50           |
| Transferrin saturation % | <b>H</b> 0.782 | 1    | 0.2-0.5         |
| Ferritin                 | 118            | µg/L | 10-200          |
| C-Reactive Protein, CRP  | 4              | mg/L | 0-5             |
| Haptoglobin              | <b>L</b> 0.07  | g/L  | 0.16-1.99       |

#### Enzymes

|                                      | Value         | Unit   | Reference range |
|--------------------------------------|---------------|--------|-----------------|
| Alkaline Phosphatase, AP             | <b>L</b> 0.66 | µkat/L | 0.71-1.67       |
| Aspartate Aminotransferase, AST, GOT | <b>H</b> 1.11 | µkat/L | 0.17-1          |
| Alanine Aminotransferase, ALT        | 0.31          | µkat/L | 0.17-0.48       |

|                   |                                       |     |           |                                |                                                                       |
|-------------------|---------------------------------------|-----|-----------|--------------------------------|-----------------------------------------------------------------------|
| Metamyelocytes %  | <span style="color: orange;">L</span> | 0 1 | 0.13-0.32 | GPT                            |                                                                       |
| Band neutrophil % |                                       | 0 1 | 0-0.1     | Gamma-Glutamyltransferase, GGT | 0.34 µkat/L <sup>0-0.65</sup>                                         |
| Plasmacytes %     |                                       | 0 1 | 0-0       | Lactate Dehydrogenase, LD      | <span style="color: orange;">H</span> 37.12 µkat/L <sup>1.7-3.2</sup> |

|                                                                                                                       |                                |                         |
|-----------------------------------------------------------------------------------------------------------------------|--------------------------------|-------------------------|
|  <b>Smart Blood Analytics Report</b> | Model used: Hematology (CT181) | Report Date: 2017/05/30 |
|-----------------------------------------------------------------------------------------------------------------------|--------------------------------|-------------------------|

| ICD                                           | Prevalence | Prediction | Information | Description                                                                                             |
|-----------------------------------------------|------------|------------|-------------|---------------------------------------------------------------------------------------------------------|
| <span style="color: darkblue;">■</span> D53   | 1.14%      | 18.20%     | 3.99        | <b>Other nutritional anaemias</b>                                                                       |
| <span style="color: blue;">■</span> D46       | 5.56%      | 15.40%     | 1.47        | <b>Myelodysplastic syndromes</b>                                                                        |
| <span style="color: lightblue;">■</span> D75  | 6.64%      | 13.80%     | 1.06        | <b>Other diseases of blood and blood-forming organs</b>                                                 |
| <span style="color: cyan;">■</span> D51       | 1.09%      | 11.00%     | 3.33        | <b>Vitamin B12 deficiency anaemia</b>                                                                   |
| <span style="color: lightcyan;">■</span> D64  | 2.65%      | 9.80%      | 1.89        | <b>Other anaemias</b>                                                                                   |
| <span style="color: yellow;">■</span> D69     | 9.02%      | 6.00%      | -0.59       | <b>Purpura and other haemorrhagic conditions</b>                                                        |
| <span style="color: orange;">■</span> D47     | 18.50%     | 4.20%      | -2.14       | <b>Other neoplasms of uncertain or unknown behaviour of lymphoid, haematopoietic and related tissue</b> |
| <span style="color: darkorange;">■</span> D59 | 0.95%      | 3.80%      | 2.00        | <b>Acquired haemolytic anaemia</b>                                                                      |
| <span style="color: red;">■</span> C92        | 7.01%      | 3.60%      | -0.96       | <b>Myeloid leukaemia</b>                                                                                |
| <span style="color: darkred;">■</span> D50    | 14.45%     | 3.00%      | -2.27       | <b>Iron deficiency anaemia</b>                                                                          |

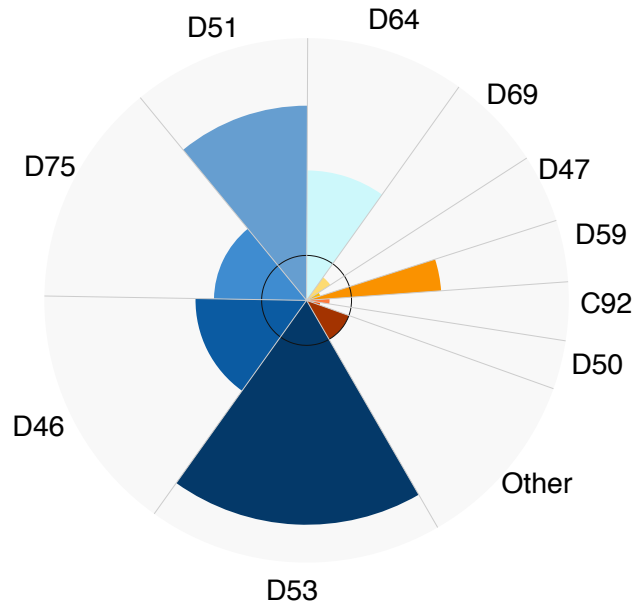

## Smart Blood Analytics report #615

**i** #77 primer 10

Female,

### Blood Parameters

Lab Test Date: /

#### Hematology

|                                                 | Value           | Unit    | Reference range |
|-------------------------------------------------|-----------------|---------|-----------------|
| Leukocyte count, WBC                            | 9.06            | 1E9/L   | 4-10            |
| Neutrophils count                               | 3.90            | 1E9/L   | 1.5-7.4         |
| Lymphocyte count                                | <b>H</b> 3.62   | 1E9/L   | 1-3.4           |
| Monocyte count                                  | 0.82            | 1E9/L   | 0.21-0.92       |
| Eosinophils count                               | <b>L</b> 0      | 1E9/L   | 0.02-0.67       |
| Basophils count                                 | 0.07            | 1E9/L   | 0-0.13          |
| Immature granulocytes count                     | <b>H</b> 0.45   | 1E9/L   | 0-0             |
| Erythroblasts count                             | <b>H</b> 0.18   | 1E9/L   | 0-0             |
| Neutrophils %                                   | <b>L</b> 0.39   | 1       | 0.4-0.7         |
| Lymphocyte %                                    | 0.40            | 1       | 0.22-0.44       |
| Monocyte %                                      | 0.09            | 1       | 0.04-0.11       |
| Eosinophils %                                   | 0               | 1       | 0-0.08          |
| Basophils %                                     | 0.03            | 1       | 0-0.03          |
| Immature Granulocytes %                         | <b>H</b> 0.084  | 1       | 0-0.01          |
| Erythroblast %                                  | <b>H</b> 0.03   | 1       | 0-0             |
| Hemoglobin                                      | <b>L</b> 73     | g/L     | 120-150         |
| Hematocrit                                      | <b>L</b> 0.231  | 1       | 0.36-0.46       |
| Erythrocyte count, RBC                          | <b>L</b> 2.35   | 1E12/L  | 4-5.2           |
| Mean Corpuscular Volume, MCV                    | 98.3            | fL      | 83-101          |
| Mean Corpuscular Hemoglobin, MCH                | 31.1            | pg/cell | 27-32           |
| Mean Corpuscular Hemoglobin Concentration, MCHC | 316             | g/L     | 315-345         |
| Erythrocyte Distribution Width, RDW             | <b>H</b> 0.20   | 1       | 0.116-0.14      |
| Reticulocytes count, urgent automated           | 66.7            | 1E9/L   | 20-100          |
| Reticulocytes %                                 | <b>H</b> 0.0284 | 1       | 0.005-0.025     |
| Hypochromic red cells %, Hypo-He                | 0.015           | 1       | 0-0.027         |
| Thrombocytes count, Platelet count              | <b>L</b> 125    | 1E9/L   | 150-410         |
| Mean Platelet Volume, MPV                       | <b>L</b> 8.8    | fL      | 9.2-12.9        |
| Platelet distribution width, PDW                | <b>L</b> 8.8    |         | 11-16.9         |
| Blast cells %                                   | 0               | 1       | 0-0.05          |
| Promyelocyte %                                  | <b>L</b> 0      | 1       | 0.01-0.08       |
| Myelocytes %                                    | <b>H</b> 0.01   | 1       | 0-0             |

#### Blood gas analysis and hemoglobins

|                                            | Value | Unit   | Reference range |
|--------------------------------------------|-------|--------|-----------------|
| Reticulocyte hemoglobin equivalent, Ret-He | 28.6  | pg     | 28-35           |
| Carbon dioxide content, arterial blood     | 27    | mmol/L | 24-32           |

#### Biochemistry

|                  | Value        | Unit   | Reference range |
|------------------|--------------|--------|-----------------|
| Glucose          | <b>H</b> 7.8 | mmol/L | 4.1-5.6         |
| Urea             | 6.5          | mmol/L | 2.1-7.1         |
| Potassium, K     | 4.50         | mmol/L | 3.5-5           |
| Sodium, Na       | 142          | mmol/L | 136-145         |
| Chloride, Cl     | 105          | mmol/L | 98-106          |
| Calcium, Ca      | 2.19         | mmol/L | 2.15-2.5        |
| Creatinine       | 79           | µmol/L | 0-133           |
| Uric acid        | 95           | µmol/L | 90-360          |
| Bilirubin, Total | 7            | µmol/L | 5.1-17          |
| Bilirubin Direct | 3            | µmol/L | 1.7-5.1         |
| Iron, Fe         | 11.9         | µmol/L | 9-30.4          |

#### Enzymes

|                                      | Value         | Unit     | Reference range |
|--------------------------------------|---------------|----------|-----------------|
| Acid phosphatase, AP                 | <b>H</b> 1.61 | nkatal/L | 0-0.9           |
| Alkaline Phosphatase, AP             | <b>H</b> 1.83 | µkat/L   | 0.71-1.67       |
| Aspartate Aminotransferase, AST, GOT | 0.40          | µkat/L   | 0.17-1          |
| Alanine Aminotransferase, ALT, GPT   | 0.32          | µkat/L   | 0.17-0.48       |
| Gamma-Glutamyltransferase, GGT       | 0.26          | µkat/L   | 0-0.65          |
| Lactate Dehydrogenase, LD            | <b>H</b> 3.71 | µkat/L   | 1.7-3.2         |

#### Protein and amino acid analysis

|                 | Value       | Unit | Reference range |
|-----------------|-------------|------|-----------------|
| Proteins, total | <b>H</b> 91 | g/L  | 63-79           |
| SPE Albumin     | <b>L</b> 34 | g/L  | 35-50           |
| Troponin I      | 0.006       | µg/L | 0-0.4           |

|                   |                                       |      |   |           |
|-------------------|---------------------------------------|------|---|-----------|
| Metamyelocytes %  | <span style="color: orange;">L</span> | 0.04 | 1 | 0.13-0.32 |
| Band neutrophil % |                                       | 0.04 | 1 | 0-0.1     |
| Promonocytes %    |                                       | 0    | 1 | 0-0       |
| Plasmacytes %     |                                       | 0    | 1 | 0-0       |

### Hormones and growth factors

|                                   |                                       | Value | Unit | Reference range |
|-----------------------------------|---------------------------------------|-------|------|-----------------|
| NT-Pro B-Type Natriuretic Peptide | <span style="color: orange;">H</span> | 988   | µg/L | 0-64            |

|                                        |                                       |       |      |           |
|----------------------------------------|---------------------------------------|-------|------|-----------|
| C-Reactive Protein, CRP                | <span style="color: orange;">H</span> | 13    | mg/L | 0-5       |
| Kappa free                             |                                       | 12.30 | mg/L | 3.3-19.4  |
| Lambda free                            | <span style="color: orange;">H</span> | 235   | mg/L | 5.71-26.3 |
| Kappa/Lambda coefficient               | <span style="color: orange;">L</span> | 0.05  |      | 0.26-1.65 |
| Beta-2 microglobulin                   | <span style="color: orange;">H</span> | 8.01  | mg/L | 0-2.7     |
| Haptoglobin                            |                                       | 1.5   | g/L  | 0.16-1.99 |
| SPE alpha 1                            | <span style="color: orange;">H</span> | 4.1   | g/L  | 2.3-4     |
| SPE alpha 2                            |                                       | 7.8   | g/L  | 5-9       |
| SPE beta 1                             |                                       | 3.8   | g/L  | 3-6       |
| SPE beta 2                             | <span style="color: orange;">L</span> | 2.5   | g/L  | 5-10      |
| SPE gamma                              | <span style="color: orange;">H</span> | 39    | g/L  | 7-17      |
| Albumin/Globulin Ratio electrophoresis | <span style="color: orange;">L</span> | 0.6   |      | 1-1       |

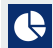

## Smart Blood Analytics Report

Model used: Hematology (CT181)

Report Date: 2017/05/30

| ICD | Prevalence | Prediction | Information | Description                                                                                             |
|-----|------------|------------|-------------|---------------------------------------------------------------------------------------------------------|
| C90 | 8.99%      | 47.80%     | 2.41        | <b>Multiple myeloma and malignant plasma cell neoplasms</b>                                             |
| D47 | 18.50%     | 8.20%      | -1.17       | <b>Other neoplasms of uncertain or unknown behaviour of lymphoid, haematopoietic and related tissue</b> |
| D46 | 5.56%      | 6.20%      | 0.16        | <b>Myelodysplastic syndromes</b>                                                                        |
| D75 | 6.64%      | 5.40%      | -0.30       | <b>Other diseases of blood and blood-forming organs</b>                                                 |
| C88 | 1.00%      | 5.20%      | 2.38        | <b>Malignant immunoproliferative diseases</b>                                                           |
| C92 | 7.01%      | 4.80%      | -0.55       | <b>Myeloid leukaemia</b>                                                                                |
| C91 | 8.45%      | 3.40%      | -1.31       | <b>Lymphoid leukaemia</b>                                                                               |
| D64 | 2.65%      | 2.80%      | 0.08        | <b>Other anaemias</b>                                                                                   |
| C83 | 2.02%      | 2.40%      | 0.25        | <b>Diffuse non-Hodgkin lymphoma</b>                                                                     |
| D69 | 9.02%      | 2.20%      | -2.04       | <b>Purpura and other haemorrhagic conditions</b>                                                        |

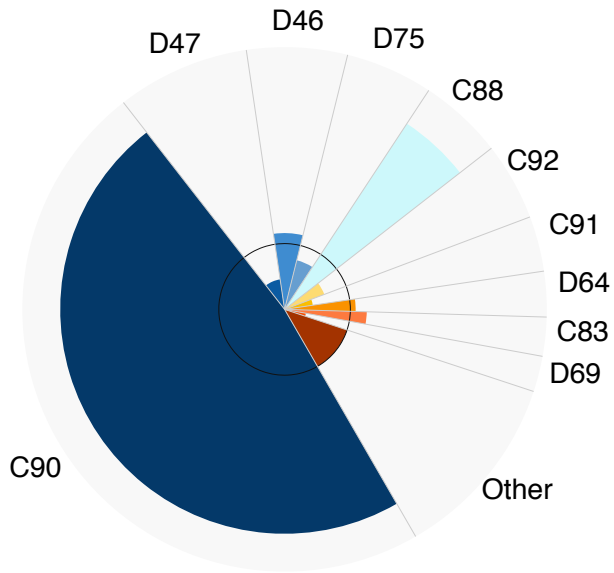

## Smart Blood Analytics report #616

**i** #78 primer 11

Female,

### **🔹** Blood Parameters

Lab Test Date: /

#### Hematology

|                                                 | Value          | Unit    | Reference range |
|-------------------------------------------------|----------------|---------|-----------------|
| Leukocyte count, WBC                            | <b>H</b> 20.74 | 1E9/L   | 4-10            |
| Neutrophils count                               | 6.84           | 1E9/L   | 1.5-7.4         |
| Lymphocyte count                                | <b>H</b> 12.86 | 1E9/L   | 1-3.4           |
| Monocyte count                                  | 0.83           | 1E9/L   | 0.21-0.92       |
| Eosinophils count                               | 0.21           | 1E9/L   | 0.02-0.67       |
| Immature granulocytes count                     | 0              | 1E9/L   | 0-0             |
| Basophils count                                 | 0.05           | 1E9/L   | 0-0.13          |
| Erythroblasts count                             | 0              | 1E9/L   | 0-0             |
| Neutrophils %                                   | <b>L</b> 0.33  | 1       | 0.4-0.7         |
| Lymphocyte %                                    | <b>H</b> 0.62  | 1       | 0.22-0.44       |
| Monocyte %                                      | 0.04           | 1       | 0.04-0.11       |
| Eosinophils %                                   | 0.01           | 1       | 0-0.08          |
| Basophils %                                     | 0              | 1       | 0-0.03          |
| Immature Granulocytes %                         | 0.003          | 1       | 0-0.01          |
| Erythroblast %                                  | 0              | 1       | 0-0             |
| Hemoglobin                                      | 135            | g/L     | 120-150         |
| Hematocrit                                      | 0.405          | 1       | 0.36-0.46       |
| Erythrocyte count, RBC                          | 4.78           | 1E12/L  | 4-5.2           |
| Mean Corpuscular Volume, MCV                    | 84.7           | fL      | 83-101          |
| Mean Corpuscular Hemoglobin, MCH                | 28.2           | pg/cell | 27-32           |
| Mean Corpuscular Hemoglobin Concentration, MCHC | 333            | g/L     | 315-345         |
| Erythrocyte Distribution Width, RDW             | 0.131          | 1       | 0.116-0.14      |
| Reticulocytes count, urgent automated           | 78.4           | 1E9/L   | 20-100          |
| Reticulocytes %                                 | 0.0164         | 1       | 0.005-0.025     |
| Hypochromic red cells %, Hypo-He                | 0.003          | 1       | 0-0.027         |
| Thrombocytes count, Platelet count              | <b>L</b> 124   | 1E9/L   | 150-410         |
| Mean Platelet Volume, MPV                       | 9.6            | fL      | 9.2-12.9        |
| Platelet distribution width, PDW                | 11.1           |         | 11-16.9         |
| Blast cells %                                   | 0              | 1       | 0-0.05          |
| Promyelocyte %                                  | <b>L</b> 0     | 1       | 0.01-0.08       |
| Myelocytes %                                    | 0              | 1       | 0-0             |

#### Blood gas analysis and hemoglobins

|                                            | Value | Unit   | Reference range |
|--------------------------------------------|-------|--------|-----------------|
| Reticulocyte hemoglobin equivalent, Ret-He | 30    | pg     | 28-35           |
| Carbon dioxide content, arterial blood     | 26    | mmol/L | 24-32           |

#### Biochemistry

|                              | Value        | Unit   | Reference range |
|------------------------------|--------------|--------|-----------------|
| Glucose                      | <b>H</b> 9.1 | mmol/L | 4.1-5.6         |
| Urea                         | 6.2          | mmol/L | 2.1-7.1         |
| Potassium, K                 | 4.70         | mmol/L | 3.5-5           |
| Sodium, Na                   | 144          | mmol/L | 136-145         |
| Chloride, Cl                 | <b>H</b> 107 | mmol/L | 98-106          |
| Calcium, Ca                  | 2.30         | mmol/L | 2.15-2.5        |
| Phosphate                    | 1.09         | mmol/L | 0.87-1.45       |
| Creatinine                   | 70           | µmol/L | 0-133           |
| Uric acid                    | <b>H</b> 375 | µmol/L | 90-360          |
| Bilirubin, Total             | 13           | µmol/L | 5.1-17          |
| Bilirubin Direct             | 5            | µmol/L | 1.7-5.1         |
| Iron, Fe                     | <b>L</b> 7.3 | µmol/L | 9-30.4          |
| Iron-binding capacity, total | 53.9         | µmol/L | 40.8-76.7       |

#### Protein and amino acid analysis

|                          | Value          | Unit | Reference range |
|--------------------------|----------------|------|-----------------|
| Proteins, total          | 71             | g/L  | 63-79           |
| SPE Albumin              | 46             | g/L  | 35-50           |
| Transferrin saturation % | <b>L</b> 0.135 | 1    | 0.2-0.5         |
| Ferritin                 | 152            | µg/L | 10-200          |
| C-Reactive Protein, CRP  | <b>H</b> 45    | mg/L | 0-5             |

#### Enzymes

|                                      | Value         | Unit   | Reference range |
|--------------------------------------|---------------|--------|-----------------|
| Alkaline Phosphatase, AP             | <b>H</b> 1.94 | µkat/L | 0.71-1.67       |
| Aspartate Aminotransferase, AST, GOT | 0.39          | µkat/L | 0.17-1          |
| Alanine Aminotransferase, ALT, GPT   | 0.28          | µkat/L | 0.17-0.48       |



|                   |                                       |     |           |                                |                                       |             |
|-------------------|---------------------------------------|-----|-----------|--------------------------------|---------------------------------------|-------------|
| Metamyelocytes %  | <span style="color: orange;">L</span> | 0 1 | 0.13-0.32 | Gamma-Glutamyltransferase, GGT | 0.38 µkat/L                           | 0-0.65      |
| Band neutrophil % |                                       | 0 1 | 0-0.1     | Lactate Dehydrogenase, LD      | <span style="color: orange;">H</span> | 4.74 µkat/L |
| Promonocytes %    |                                       | 0 1 | 0-0       |                                |                                       | 1.7-3.2     |
| Plasmacytes %     |                                       | 0 1 | 0-0       |                                |                                       |             |

|                                                                                                                       |                                |                         |
|-----------------------------------------------------------------------------------------------------------------------|--------------------------------|-------------------------|
|  <b>Smart Blood Analytics Report</b> | Model used: Hematology (CT181) | Report Date: 2017/05/30 |
|-----------------------------------------------------------------------------------------------------------------------|--------------------------------|-------------------------|

|                                            | ICD | Prevalence | Prediction | Information | Description                                                                                             |
|--------------------------------------------|-----|------------|------------|-------------|---------------------------------------------------------------------------------------------------------|
| <span style="color: darkblue;">■</span>    | C91 | 8.45%      | 81.00%     | 3.26        | <b>Lymphoid leukaemia</b>                                                                               |
| <span style="color: blue;">■</span>        | C83 | 2.02%      | 8.60%      | 2.09        | <b>Diffuse non-Hodgkin lymphoma</b>                                                                     |
| <span style="color: lightblue;">■</span>   | D69 | 9.02%      | 2.20%      | -2.04       | <b>Purpura and other haemorrhagic conditions</b>                                                        |
| <span style="color: cyan;">■</span>        | C92 | 7.01%      | 1.60%      | -2.13       | <b>Myeloid leukaemia</b>                                                                                |
| <span style="color: lightcyan;">■</span>   | D72 | 0.85%      | 1.60%      | 0.91        | <b>Other disorders of white blood cells</b>                                                             |
| <span style="color: yellow;">■</span>      | D75 | 6.64%      | 1.20%      | -2.47       | <b>Other diseases of blood and blood-forming organs</b>                                                 |
| <span style="color: orange;">■</span>      | D47 | 18.50%     | 1.20%      | -3.95       | <b>Other neoplasms of uncertain or unknown behaviour of lymphoid, haematopoietic and related tissue</b> |
| <span style="color: gold;">■</span>        | C85 | 1.09%      | 0.60%      | -0.87       | <b>Other and unspecified types of non-Hodgkin lymphoma</b>                                              |
| <span style="color: lightorange;">■</span> | D50 | 14.45%     | 0.40%      | -5.17       | <b>Iron deficiency anaemia</b>                                                                          |
| <span style="color: orange;">■</span>      | D46 | 5.56%      | 0.40%      | -3.80       | <b>Myelodysplastic syndromes</b>                                                                        |

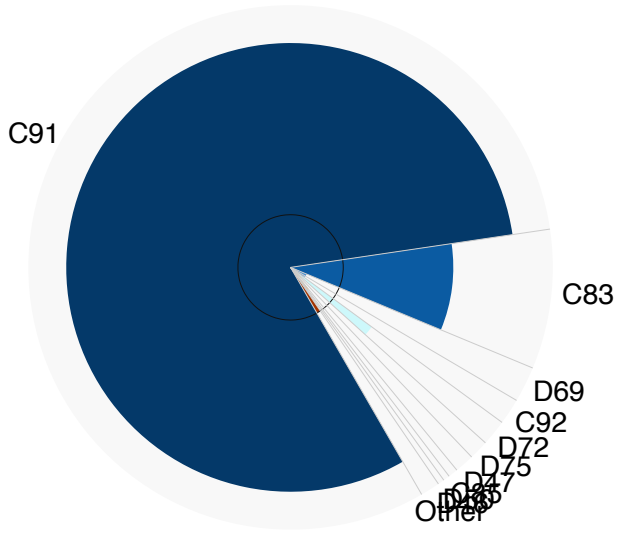

## Smart Blood Analytics report #617

**i** #79 primer 12

Male,  

### Blood Parameters

Lab Test Date: /

#### Hematology

|                                                 |   | Value | Unit    | Reference range |
|-------------------------------------------------|---|-------|---------|-----------------|
| Leukocyte count, WBC                            | H | 72.60 | 1E9/L   | 4-10            |
| Neutrophils count                               | H | 33.58 | 1E9/L   | 1.5-7.4         |
| Lymphocyte count                                | H | 5.79  | 1E9/L   | 1-3.4           |
| Monocyte count                                  | H | 11.53 | 1E9/L   | 0.21-0.92       |
| Eosinophils count                               |   | 0.02  | 1E9/L   | 0.02-0.67       |
| Basophils count                                 | H | 0.17  | 1E9/L   | 0-0.13          |
| Immature granulocytes count                     | H | 21.51 | 1E9/L   | 0-0             |
| Erythroblasts count                             | H | 0.03  | 1E9/L   | 0-0             |
| Neutrophils %                                   |   | 0.463 | 1       | 0.4-0.7         |
| Lymphocyte %                                    | L | 0.08  | 1       | 0.22-0.44       |
| Monocyte %                                      | H | 0.159 | 1       | 0.04-0.11       |
| Eosinophils %                                   |   | 0     | 1       | 0-0.08          |
| Basophils %                                     |   | 0.002 | 1       | 0-0.03          |
| Immature Granulocytes %                         | H | 0.296 | 1       | 0-0.01          |
| Erythroblast %                                  |   | 0     | 1       | 0-0             |
| Hemoglobin                                      | L | 75    | g/L     | 130-170         |
| Hematocrit                                      | L | 0.220 | 1       | 0.4-0.5         |
| Erythrocyte count, RBC                          | L | 2.26  | 1E12/L  | 4.5-5.9         |
| Mean Corpuscular Volume, MCV                    |   | 97.3  | fL      | 83-101          |
| Mean Corpuscular Hemoglobin, MCH                | H | 33.2  | pg/cell | 27-32           |
| Mean Corpuscular Hemoglobin Concentration, MCHC |   | 341   | g/L     | 315-345         |
| Erythrocyte Distribution Width, RDW             | H | 0.175 | 1       | 0.116-0.14      |
| Thrombocytes count, Platelet count              | L | 32    | 1E9/L   | 150-410         |
| Mean Platelet Volume, MPV                       |   | 11.5  | fL      | 9.4-12.2        |
| Platelet distribution width, PDW                |   | 12    |         | 11-16.9         |
| Blast cells %                                   |   | 0     | 1       | 0-0.05          |

#### Biochemistry

|                  |   | Value | Unit   | Reference range |
|------------------|---|-------|--------|-----------------|
| Glucose          |   | 5.3   | mmol/L | 4.1-5.6         |
| Urea             |   | 5.4   | mmol/L | 2.1-7.1         |
| Potassium, K     |   | 3.80  | mmol/L | 3.5-5           |
| Sodium, Na       |   | 141   | mmol/L | 136-145         |
| Chloride, Cl     | H | 107   | mmol/L | 98-106          |
| Creatinine       |   | 74    | µmol/L | 0-133           |
| Bilirubin, Total |   | 8     | µmol/L | 5.1-17          |
| Bilirubin Direct |   | 4     | µmol/L | 1.7-5.1         |

#### Enzymes

|                                      |   | Value | Unit   | Reference range |
|--------------------------------------|---|-------|--------|-----------------|
| Aspartate Aminotransferase, AST, GOT |   | 0.56  | µkat/L | 0.17-1          |
| Alanine Aminotransferase, ALT, GPT   | L | 0.17  | µkat/L | 0.22-0.68       |
| Gamma-Glutamyltransferase, GGT       |   | 0.50  | µkat/L | 0-0.94          |
| Lactate Dehydrogenase, LD            | H | 20.36 | µkat/L | 1.7-3.2         |

#### Protein and amino acid analysis

|                         |   | Value | Unit | Reference range |
|-------------------------|---|-------|------|-----------------|
| Troponin I              |   | 0.006 | µg/L | 0-0.4           |
| C-Reactive Protein, CRP | H | 15    | mg/L | 0-5             |

#### Hormones and growth factors

|                                   |   | Value | Unit | Reference range |
|-----------------------------------|---|-------|------|-----------------|
| NT-Pro B-Type Natriuretic Peptide | H | 302   | µg/L | 0-35            |
| Procalcitonin                     | H | 0.16  | µg/L | 0-0.15          |

|                                                                                     | ICD | Prevalence | Prediction | Information | Description                                                                                             |
|-------------------------------------------------------------------------------------|-----|------------|------------|-------------|---------------------------------------------------------------------------------------------------------|
|    | C92 | 7.01%      | 42.60%     | 2.60        | <b>Myeloid leukaemia</b>                                                                                |
|    | C90 | 8.99%      | 10.40%     | 0.21        | <b>Multiple myeloma and malignant plasma cell neoplasms</b>                                             |
|    | C83 | 2.02%      | 9.00%      | 2.16        | <b>Diffuse non-Hodgkin lymphoma</b>                                                                     |
|    | D47 | 18.50%     | 5.40%      | -1.78       | <b>Other neoplasms of uncertain or unknown behaviour of lymphoid, haematopoietic and related tissue</b> |
|    | C91 | 8.45%      | 4.60%      | -0.88       | <b>Lymphoid leukaemia</b>                                                                               |
|    | D46 | 5.56%      | 4.20%      | -0.40       | <b>Myelodysplastic syndromes</b>                                                                        |
|    | C93 | 0.45%      | 4.00%      | 3.15        | <b>Monocytic leukaemia</b>                                                                              |
|    | D69 | 9.02%      | 2.40%      | -1.91       | <b>Purpura and other haemorrhagic conditions</b>                                                        |
|  | C85 | 1.09%      | 2.20%      | 1.01        | <b>Other and unspecified types of non-Hodgkin lymphoma</b>                                              |
|  | D75 | 6.64%      | 2.20%      | -1.59       | <b>Other diseases of blood and blood-forming organs</b>                                                 |

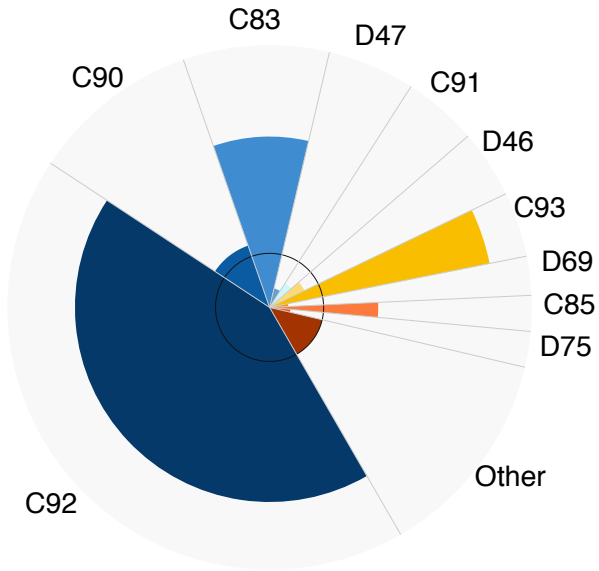

## Smart Blood Analytics report #618

**i** #80 primer 13

Female

### Blood Parameters

Lab Test Date: /

#### Hematology

|                                                 | Value           | Unit    | Reference range |
|-------------------------------------------------|-----------------|---------|-----------------|
| Leukocyte count, WBC                            | <b>H</b> 199.33 | 1E9/L   | 4-10            |
| Neutrophils count                               | <b>H</b> 137.54 | 1E9/L   | 1.5-7.4         |
| Lymphocyte count                                | 1.99            | 1E9/L   | 1-3.4           |
| Monocyte count                                  | <b>H</b> 1.99   | 1E9/L   | 0.21-0.92       |
| Eosinophils count                               | <b>H</b> 5.98   | 1E9/L   | 0.02-0.67       |
| Basophils count                                 | <b>H</b> 5.07   | 1E9/L   | 0-0.13          |
| Immature granulocytes count                     | <b>H</b> 47.84  | 1E9/L   | 0-0             |
| Erythroblasts count                             | <b>H</b> 0.38   | 1E9/L   | 0-0             |
| Neutrophils %                                   | 0.52            | 1       | 0.4-0.7         |
| Lymphocyte %                                    | <b>L</b> 0.01   | 1       | 0.22-0.44       |
| Monocyte %                                      | <b>L</b> 0.01   | 1       | 0.04-0.11       |
| Eosinophils %                                   | 0.03            | 1       | 0-0.08          |
| Basophils %                                     | 0.01            | 1       | 0-0.03          |
| Immature Granulocytes %                         | <b>H</b> 0.301  | 1       | 0-0.01          |
| Erythroblast %                                  | <b>H</b> 0.01   | 1       | 0-0             |
| Hemoglobin                                      | <b>L</b> 83     | g/L     | 120-150         |
| Hematocrit                                      | <b>L</b> 0.241  | 1       | 0.36-0.46       |
| Erythrocyte count, RBC                          | <b>L</b> 3.07   | 1E12/L  | 4-5.2           |
| Mean Corpuscular Volume, MCV                    | <b>L</b> 78.5   | fL      | 83-101          |
| Mean Corpuscular Hemoglobin, MCH                | 27              | pg/cell | 27-32           |
| Mean Corpuscular Hemoglobin Concentration, MCHC | 344             | g/L     | 315-345         |
| Erythrocyte Distribution Width, RDW             | <b>H</b> 0.196  | 1       | 0.116-0.14      |
| Thrombocytes count, Platelet count              | 311             | 1E9/L   | 150-410         |
| Mean Platelet Volume, MPV                       | 11.8            | fL      | 9.2-12.9        |
| Platelet distribution width, PDW                | <b>H</b> 18.1   |         | 11-16.9         |
| Blast cells %                                   | 0.01            | 1       | 0-0.05          |
| Promyelocyte %                                  | 0.01            | 1       | 0.01-0.08       |
| Myelocytes %                                    | <b>H</b> 0.08   | 1       | 0-0             |
| Metamyelocytes %                                | 0.15            | 1       | 0.13-0.32       |
| Band neutrophil %                               | <b>H</b> 0.17   | 1       | 0-0.1           |
| Promonocytes %                                  | 0               | 1       | 0-0             |
| Plasmacytes %                                   | 0               | 1       | 0-0             |

#### Biochemistry

|                  | Value         | Unit   | Reference range |
|------------------|---------------|--------|-----------------|
| Glucose          | 5.5           | mmol/L | 4.1-5.6         |
| Urea             | 4.1           | mmol/L | 2.1-7.1         |
| Potassium, K     | 4             | mmol/L | 3.5-5           |
| Sodium, Na       | 138           | mmol/L | 136-145         |
| Chloride, Cl     | 104           | mmol/L | 98-106          |
| Calcium, Ca      | <b>L</b> 1.82 | mmol/L | 2.15-2.5        |
| Phosphate        | 1.31          | mmol/L | 0.87-1.45       |
| Creatinine       | 36            | µmol/L | 0-133           |
| Uric acid        | <b>L</b> 63   | µmol/L | 90-360          |
| Bilirubin, Total | 9             | µmol/L | 5.1-17          |
| Bilirubin Direct | 5             | µmol/L | 1.7-5.1         |
| Iron, Fe         | <b>L</b> 2.8  | µmol/L | 9-30.4          |

#### Blood gas analysis and hemoglobins

|                                        | Value | Unit   | Reference range |
|----------------------------------------|-------|--------|-----------------|
| Carbon dioxide content, arterial blood | 26    | mmol/L | 24-32           |

#### Protein and amino acid analysis

|                         | Value        | Unit | Reference range |
|-------------------------|--------------|------|-----------------|
| Proteins, total         | <b>L</b> 43  | g/L  | 63-79           |
| SPE Albumin             | <b>L</b> 24  | g/L  | 35-50           |
| C-Reactive Protein, CRP | <b>H</b> 230 | mg/L | 0-5             |

#### Enzymes

|                                      | Value         | Unit   | Reference range |
|--------------------------------------|---------------|--------|-----------------|
| Alkaline Phosphatase, AP             | <b>H</b> 4.55 | µkat/L | 0.71-1.67       |
| Aspartate Aminotransferase, AST, GOT | 0.63          | µkat/L | 0.17-1          |
| Alanine Aminotransferase, ALT, GPT   | 0.38          | µkat/L | 0.17-0.48       |
| Gamma-Glutamyltransferase, GGT       | <b>H</b> 1.53 | µkat/L | 0-0.65          |
| Lactate Dehydrogenase, LD            | <b>H</b> 5.96 | µkat/L | 1.7-3.2         |

### Hormones and growth factors

|                                   | Value | Unit | Reference range |
|-----------------------------------|-------|------|-----------------|
| NT-Pro B-Type Natriuretic Peptide | 792   | µg/L | 0-64            |

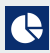

## Smart Blood Analytics Report

Model used: Hematology (CT181)

Report Date: 2017/05/30

| ICD | Prevalence | Prediction | Information | Description                                                                                             |
|-----|------------|------------|-------------|---------------------------------------------------------------------------------------------------------|
| C92 | 7.01%      | 42.60%     | 2.60        | <b>Myeloid leukaemia</b>                                                                                |
| D47 | 18.50%     | 11.00%     | -0.75       | <b>Other neoplasms of uncertain or unknown behaviour of lymphoid, haematopoietic and related tissue</b> |
| D50 | 14.45%     | 5.20%      | -1.47       | <b>Iron deficiency anaemia</b>                                                                          |
| C91 | 8.45%      | 4.20%      | -1.01       | <b>Lymphoid leukaemia</b>                                                                               |
| D75 | 6.64%      | 3.60%      | -0.88       | <b>Other diseases of blood and blood-forming organs</b>                                                 |
| C90 | 8.99%      | 3.20%      | -1.49       | <b>Multiple myeloma and malignant plasma cell neoplasms</b>                                             |
| D63 | 0.85%      | 3.00%      | 1.82        | <b>Anaemia in chronic diseases classified elsewhere</b>                                                 |
| D46 | 5.56%      | 2.80%      | -0.99       | <b>Myelodysplastic syndromes</b>                                                                        |
| D64 | 2.65%      | 2.40%      | -0.14       | <b>Other anaemias</b>                                                                                   |
| C83 | 2.02%      | 2.40%      | 0.25        | <b>Diffuse non-Hodgkin lymphoma</b>                                                                     |

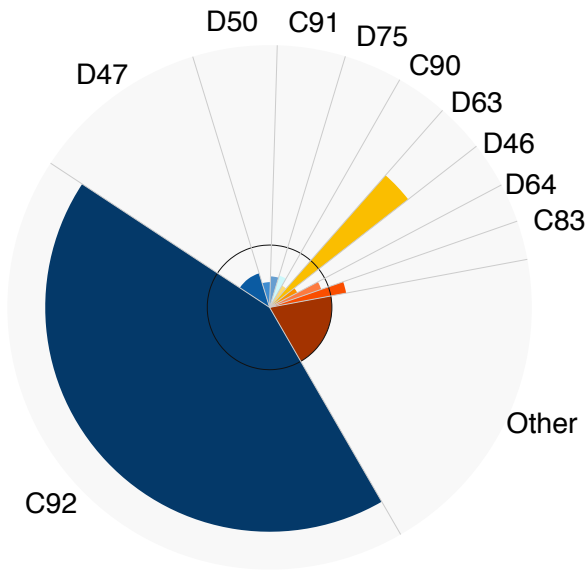



## Smart Blood Analytics report #619

**i** #81 primer 14

Female,

### Blood Parameters

Lab Test Date: /

#### Hematology

|                                                 |          | Value | Unit    | Reference range |
|-------------------------------------------------|----------|-------|---------|-----------------|
| Leukocyte count, WBC                            | <b>H</b> | 44.67 | 1E9/L   | 4-10            |
| Neutrophils count                               |          | 2.68  | 1E9/L   | 1.5-7.4         |
| Lymphocyte count                                | <b>H</b> | 40.65 | 1E9/L   | 1-3.4           |
| Monocyte count                                  |          | 0.89  | 1E9/L   | 0.21-0.92       |
| Eosinophils count                               | <b>L</b> | 0     | 1E9/L   | 0.02-0.67       |
| Basophils count                                 |          | 0.13  | 1E9/L   | 0-0.13          |
| Immature granulocytes count                     | <b>H</b> | 0.45  | 1E9/L   | 0-0             |
| Erythroblasts count                             |          | 0     | 1E9/L   | 0-0             |
| Neutrophils %                                   | <b>L</b> | 0.06  | 1       | 0.4-0.7         |
| Lymphocyte %                                    | <b>H</b> | 0.91  | 1       | 0.22-0.44       |
| Monocyte %                                      | <b>L</b> | 0.02  | 1       | 0.04-0.11       |
| Eosinophils %                                   |          | 0     | 1       | 0-0.08          |
| Basophils %                                     |          | 0     | 1       | 0-0.03          |
| Immature Granulocytes %                         |          | 0.001 | 1       | 0-0.01          |
| Erythroblast %                                  |          | 0     | 1       | 0-0             |
| Hemoglobin                                      | <b>L</b> | 106   | g/L     | 120-150         |
| Hematocrit                                      | <b>L</b> | 0.336 | 1       | 0.36-0.46       |
| Erythrocyte count, RBC                          | <b>L</b> | 3.32  | 1E12/L  | 4-5.2           |
| Mean Corpuscular Volume, MCV                    | <b>H</b> | 101.2 | fL      | 83-101          |
| Mean Corpuscular Hemoglobin, MCH                |          | 31.9  | pg/cell | 27-32           |
| Mean Corpuscular Hemoglobin Concentration, MCHC |          | 315   | g/L     | 315-345         |
| Erythrocyte Distribution Width, RDW             |          | 0.123 | 1       | 0.116-0.14      |
| Reticulocytes count, urgent automated           |          | 36.5  | 1E9/L   | 20-100          |
| Reticulocytes %                                 |          | 0.011 | 1       | 0.005-0.025     |
| Hypochromic red cells %, Hypo-He                |          | 0.002 | 1       | 0-0.027         |
| Thrombocytes count, Platelet count              |          | 180   | 1E9/L   | 150-410         |
| Mean Platelet Volume, MPV                       |          | 9.3   | fL      | 9.2-12.9        |
| Platelet distribution width, PDW                | <b>L</b> | 9.2   |         | 11-16.9         |
| Blast cells %                                   |          | 0     | 1       | 0-0.05          |
| Promyelocyte %                                  | <b>L</b> | 0     | 1       | 0.01-0.08       |
| Myelocytes %                                    | <b>H</b> | 0.01  | 1       | 0-0             |

#### Blood gas analysis and hemoglobins

|                                            | Value | Unit   | Reference range |
|--------------------------------------------|-------|--------|-----------------|
| Reticulocyte hemoglobin equivalent, Ret-He | 34.3  | pg     | 28-35           |
| Carbon dioxide content, arterial blood     | 32    | mmol/L | 24-32           |

#### Biochemistry

|                              | Value    | Unit | Reference range |           |
|------------------------------|----------|------|-----------------|-----------|
| Glucose                      | <b>H</b> | 6.2  | mmol/L          | 4.1-5.6   |
| Urea                         |          | 5.5  | mmol/L          | 2.1-7.1   |
| Potassium, K                 |          | 4.30 | mmol/L          | 3.5-5     |
| Sodium, Na                   |          | 143  | mmol/L          | 136-145   |
| Chloride, Cl                 |          | 106  | mmol/L          | 98-106    |
| Calcium, Ca                  |          | 2.31 | mmol/L          | 2.15-2.5  |
| Phosphate                    |          | 1    | mmol/L          | 0.87-1.45 |
| Creatinine                   |          | 52   | µmol/L          | 0-133     |
| Uric acid                    |          | 248  | µmol/L          | 90-360    |
| Bilirubin, Total             |          | 17   | µmol/L          | 5.1-17    |
| Bilirubin Direct             |          | 5    | µmol/L          | 1.7-5.1   |
| Iron, Fe                     |          | 14.7 | µmol/L          | 9-30.4    |
| Iron-binding capacity, total |          | 48.8 | µmol/L          | 40.8-76.7 |

#### Protein and amino acid analysis

|                          | Value | Unit | Reference range |
|--------------------------|-------|------|-----------------|
| Proteins, total          | 69    | g/L  | 63-79           |
| SPE Albumin              | 46    | g/L  | 35-50           |
| Transferrin saturation % | 0.301 | 1    | 0.2-0.5         |
| Ferritin                 | 70    | µg/L | 10-200          |
| C-Reactive Protein, CRP  | 4     | mg/L | 0-5             |

#### Enzymes

|                                      | Value | Unit   | Reference range |
|--------------------------------------|-------|--------|-----------------|
| Alkaline Phosphatase, AP             | 1.17  | µkat/L | 0.71-1.67       |
| Aspartate Aminotransferase, AST, GOT | 0.20  | µkat/L | 0.17-1          |
| Alanine Aminotransferase, ALT, GPT   | 0.20  | µkat/L | 0.17-0.48       |
| Gamma-Glutamyltransferase,           | 0.14  | µkat/L | 0-0.65          |

|                   |                                       |     |           |                           |                                     |
|-------------------|---------------------------------------|-----|-----------|---------------------------|-------------------------------------|
| Metamyelocytes %  | <span style="color: orange;">L</span> | 0 1 | 0.13-0.32 | GGT                       |                                     |
| Band neutrophil % |                                       | 0 1 | 0-0.1     | Lactate Dehydrogenase, LD | 2.20 $\mu$ kat/L <sup>1.7-3.2</sup> |
| Promonocytes %    |                                       | 0 1 | 0-0       |                           |                                     |
| Plasmacytes %     |                                       | 0 1 | 0-0       |                           |                                     |

|                                                                                                                       |                                |                         |
|-----------------------------------------------------------------------------------------------------------------------|--------------------------------|-------------------------|
|  <b>Smart Blood Analytics Report</b> | Model used: Hematology (CT181) | Report Date: 2017/05/30 |
|-----------------------------------------------------------------------------------------------------------------------|--------------------------------|-------------------------|

|                                                                                     | ICD | Prevalence | Prediction | Information | Description                                                                                             |
|-------------------------------------------------------------------------------------|-----|------------|------------|-------------|---------------------------------------------------------------------------------------------------------|
|    | C91 | 8.45%      | 65.40%     | 2.95        | <b>Lymphoid leukaemia</b>                                                                               |
|    | D72 | 0.85%      | 6.60%      | 2.95        | <b>Other disorders of white blood cells</b>                                                             |
|    | C83 | 2.02%      | 6.20%      | 1.62        | <b>Diffuse non-Hodgkin lymphoma</b>                                                                     |
|    | C92 | 7.01%      | 5.20%      | -0.43       | <b>Myeloid leukaemia</b>                                                                                |
|  | D47 | 18.50%     | 2.40%      | -2.95       | <b>Other neoplasms of uncertain or unknown behaviour of lymphoid, haematopoietic and related tissue</b> |
|  | C85 | 1.09%      | 2.20%      | 1.01        | <b>Other and unspecified types of non-Hodgkin lymphoma</b>                                              |
|  | C88 | 1.00%      | 1.80%      | 0.85        | <b>Malignant immunoproliferative diseases</b>                                                           |
|  | C84 | 0.16%      | 1.60%      | 3.34        | <b>Peripheral and cutaneous T-cell lymphomas</b>                                                        |
|  | D46 | 5.56%      | 1.60%      | -1.80       | <b>Myelodysplastic syndromes</b>                                                                        |
|  | D75 | 6.64%      | 1.60%      | -2.05       | <b>Other diseases of blood and blood-forming organs</b>                                                 |

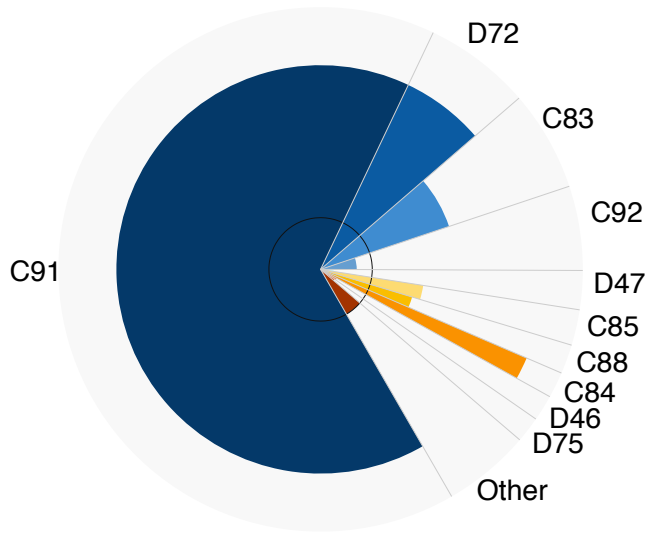

## Smart Blood Analytics report #620

**i** #82 primer 15

Female,  

### **🔹** Blood Parameters

Lab Test Date: /

#### Hematology

|                                                 | Value         | Unit    | Reference range |
|-------------------------------------------------|---------------|---------|-----------------|
| Leukocyte count, WBC                            | 8.22          | 1E9/L   | 4-10            |
| Neutrophils count                               | 4.77          | 1E9/L   | 1.5-7.4         |
| Lymphocyte count                                | 2.22          | 1E9/L   | 1-3.4           |
| Monocyte count                                  | 0.41          | 1E9/L   | 0.21-0.92       |
| Eosinophils count                               | 0.41          | 1E9/L   | 0.02-0.67       |
| Basophils count                                 | <b>H</b> 0.14 | 1E9/L   | 0-0.13          |
| Immature granulocytes count                     | 0             | 1E9/L   | 0-0             |
| Erythroblasts count                             | 0             | 1E9/L   | 0-0             |
| Neutrophils %                                   | 0.58          | 1       | 0.4-0.7         |
| Lymphocyte %                                    | 0.27          | 1       | 0.22-0.44       |
| Monocyte %                                      | 0.05          | 1       | 0.04-0.11       |
| Eosinophils %                                   | 0.05          | 1       | 0-0.08          |
| Basophils %                                     | <b>H</b> 0.05 | 1       | 0-0.03          |
| Immature Granulocytes %                         | 0.002         | 1       | 0-0.01          |
| Erythroblast %                                  | 0             | 1       | 0-0             |
| Hemoglobin                                      | 141           | g/L     | 120-150         |
| Hematocrit                                      | 0.422         | 1       | 0.36-0.46       |
| Erythrocyte count, RBC                          | 4.84          | 1E12/L  | 4-5.2           |
| Mean Corpuscular Volume, MCV                    | 87.2          | fL      | 83-101          |
| Mean Corpuscular Hemoglobin, MCH                | 29.1          | pg/cell | 27-32           |
| Mean Corpuscular Hemoglobin Concentration, MCHC | 334           | g/L     | 315-345         |
| Erythrocyte Distribution Width, RDW             | 0.129         | 1       | 0.116-0.14      |
| Reticulocytes count, urgent automated           | 63.9          | 1E9/L   | 20-100          |
| Reticulocytes %                                 | 0.0132        | 1       | 0.005-0.025     |
| Hypochromic red cells %, Hypo-He                | 0.002         | 1       | 0-0.027         |
| Thrombocytes count, Platelet count              | <b>H</b> 549  | 1E9/L   | 150-410         |
| Mean Platelet Volume, MPV                       | 10.3          | fL      | 9.2-12.9        |
| Platelet distribution width, PDW                | 12            |         | 11-16.9         |
| Blast cells %                                   | 0             | 1       | 0-0.05          |
| Promyelocyte %                                  | <b>L</b> 0    | 1       | 0.01-0.08       |
| Myelocytes %                                    | 0             | 1       | 0-0             |
| Metamyelocytes %                                | <b>L</b> 0    | 1       | 0.13-0.32       |

#### Blood gas analysis and hemoglobins

|                                            | Value | Unit   | Reference range |
|--------------------------------------------|-------|--------|-----------------|
| Reticulocyte hemoglobin equivalent, Ret-He | 31.1  | pg     | 28-35           |
| Carbon dioxide content, arterial blood     | 26    | mmol/L | 24-32           |

#### Biochemistry

|                              | Value         | Unit   | Reference range |
|------------------------------|---------------|--------|-----------------|
| Glucose                      | 4.7           | mmol/L | 4.1-5.6         |
| Urea                         | 5.3           | mmol/L | 2.1-7.1         |
| Potassium, K                 | <b>H</b> 5.10 | mmol/L | 3.5-5           |
| Sodium, Na                   | 139           | mmol/L | 136-145         |
| Chloride, Cl                 | 104           | mmol/L | 98-106          |
| Calcium, Ca                  | 2.37          | mmol/L | 2.15-2.5        |
| Phosphate                    | 1.14          | mmol/L | 0.87-1.45       |
| Creatinine                   | 68            | µmol/L | 0-133           |
| Uric acid                    | 250           | µmol/L | 90-360          |
| Bilirubin, Total             | <b>H</b> 28   | µmol/L | 5.1-17          |
| Bilirubin Direct             | <b>H</b> 9    | µmol/L | 1.7-5.1         |
| Iron, Fe                     | 20.6          | µmol/L | 9-30.4          |
| Iron-binding capacity, total | 63.3          | µmol/L | 40.8-76.7       |

#### Protein and amino acid analysis

|                          | Value | Unit | Reference range |
|--------------------------|-------|------|-----------------|
| Proteins, total          | 70    | g/L  | 63-79           |
| SPE Albumin              | 45    | g/L  | 35-50           |
| Transferrin saturation % | 0.325 | 1    | 0.2-0.5         |
| Ferritin                 | 19    | µg/L | 10-200          |
| C-Reactive Protein, CRP  | 4     | mg/L | 0-5             |

#### Enzymes

|                                      | Value | Unit   | Reference range |
|--------------------------------------|-------|--------|-----------------|
| Alkaline Phosphatase, AP             | 0.79  | µkat/L | 0.71-1.67       |
| Aspartate Aminotransferase, AST, GOT | 0.31  | µkat/L | 0.17-1          |
| Alanine Aminotransferase, ALT, GPT   | 0.24  | µkat/L | 0.17-0.48       |

|                   |     |       |                                |             |         |
|-------------------|-----|-------|--------------------------------|-------------|---------|
| Band neutrophil % | 0 1 | 0-0.1 | Gamma-Glutamyltransferase, GGT | 0.22 µkat/L | 0-0.65  |
| Promonocytes %    | 0 1 | 0-0   | Lactate Dehydrogenase, LD      | 2.62 µkat/L | 1.7-3.2 |
| Plasmacytes %     | 0 1 | 0-0   |                                |             |         |

|                                                                                   |                                     |                                |                         |
|-----------------------------------------------------------------------------------|-------------------------------------|--------------------------------|-------------------------|
|  | <b>Smart Blood Analytics Report</b> | Model used: Hematology (CT181) | Report Date: 2017/05/30 |
|-----------------------------------------------------------------------------------|-------------------------------------|--------------------------------|-------------------------|

|                                                                                     | ICD | Prevalence | Prediction | Information | Description                                                                                             |
|-------------------------------------------------------------------------------------|-----|------------|------------|-------------|---------------------------------------------------------------------------------------------------------|
|    | D47 | 18.50%     | 37.60%     | 1.02        | <b>Other neoplasms of uncertain or unknown behaviour of lymphoid, haematopoietic and related tissue</b> |
|    | D75 | 6.64%      | 20.80%     | 1.65        | <b>Other diseases of blood and blood-forming organs</b>                                                 |
|    | D50 | 14.45%     | 16.40%     | 0.18        | <b>Iron deficiency anaemia</b>                                                                          |
|    | D68 | 1.20%      | 4.40%      | 1.87        | <b>Other coagulation defects</b>                                                                        |
|   | D69 | 9.02%      | 4.20%      | -1.10       | <b>Purpura and other haemorrhagic conditions</b>                                                        |
|  | D45 | 2.47%      | 3.60%      | 0.54        | <b>Polycythaemia vera</b>                                                                               |
|  | D58 | 0.17%      | 3.20%      | 4.23        | <b>Other hereditary haemolytic anaemias</b>                                                             |
|  | D64 | 2.65%      | 1.60%      | -0.73       | <b>Other anaemias</b>                                                                                   |
|  | D72 | 0.85%      | 1.40%      | 0.72        | <b>Other disorders of white blood cells</b>                                                             |
|  | D66 | 0.52%      | 1.20%      | 1.20        | <b>Hereditary factor VIII deficiency</b>                                                                |

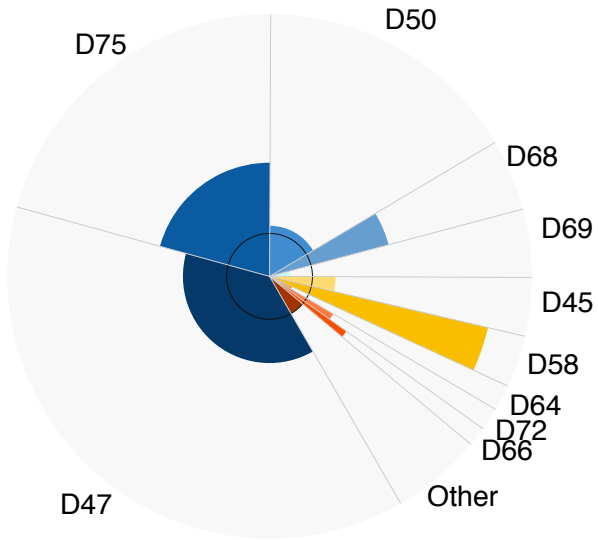

## Smart Blood Analytics report #621

**i** #83 primer 16

Male,  

### **🔹** Blood Parameters

Lab Test Date: /

#### Hematology

|                                                 | Value  | Unit    | Reference range |
|-------------------------------------------------|--------|---------|-----------------|
| Leukocyte count, WBC                            | 6.92   | 1E9/L   | 4-10            |
| Neutrophils count                               | 3.81   | 1E9/L   | 1.5-7.4         |
| Lymphocyte count                                | 2.35   | 1E9/L   | 1-3.4           |
| Monocyte count                                  | 0.42   | 1E9/L   | 0.21-0.92       |
| Eosinophils count                               | 0.28   | 1E9/L   | 0.02-0.67       |
| Basophils count                                 | 0.03   | 1E9/L   | 0-0.13          |
| Immature granulocytes count                     | 0      | 1E9/L   | 0-0             |
| Erythroblasts count                             | 0      | 1E9/L   | 0-0             |
| Neutrophils non-segmented % <b>H</b>            | 0.55   | 1       | 0.03-0.05       |
| Lymphocyte %                                    | 0.34   | 1       | 0.22-0.44       |
| Monocyte %                                      | 0.06   | 1       | 0.04-0.11       |
| Eosinophils %                                   | 0.04   | 1       | 0-0.08          |
| Basophils %                                     | 0.01   | 1       | 0-0.03          |
| Immature Granulocytes %                         | 0.003  | 1       | 0-0.01          |
| Erythroblast %                                  | 0      | 1       | 0-0             |
| Hemoglobin                                      | 150    | g/L     | 130-170         |
| Hematocrit                                      | 0.447  | 1       | 0.4-0.5         |
| Erythrocyte count, RBC                          | 5.55   | 1E12/L  | 4.5-5.9         |
| Mean Corpuscular Volume, MCV <b>L</b>           | 80.5   | fL      | 83-101          |
| Mean Corpuscular Hemoglobin, MCH                | 27     | pg/cell | 27-32           |
| Mean Corpuscular Hemoglobin Concentration, MCHC | 336    | g/L     | 315-345         |
| Erythrocyte Distribution Width, RDW             | 0.126  | 1       | 0.116-0.14      |
| Reticulocytes count, urgent automated           | 53.8   | 1E9/L   | 20-100          |
| Reticulocytes %                                 | 0.0097 | 1       | 0.005-0.025     |
| Hypochromic red cells %, Hypo-He                | 0.004  | 1       | 0-0.027         |
| Thrombocytes count, Platelet count <b>L</b>     | 35     | 1E9/L   | 150-410         |
| Mean Platelet Volume, MPV                       | 11.8   | fL      | 9.4-12.2        |
| Platelet distribution width, PDW <b>H</b>       | 20.3   |         | 11-16.9         |
| Blast cells %                                   | 0      | 1       | 0-0.05          |
| Promonocytes %                                  | 0      | 1       | 0-0             |
| Myelocytes %                                    | 0      | 1       | 0-0             |
| Metamyelocytes % <b>L</b>                       | 0      | 1       | 0.13-0.32       |

#### Blood gas analysis and hemoglobins

|                                            | Value | Unit   | Reference range |
|--------------------------------------------|-------|--------|-----------------|
| Reticulocyte hemoglobin equivalent, Ret-He | 30.6  | pg     | 28-35           |
| Carbon dioxide content, arterial blood     | 30    | mmol/L | 24-32           |

#### Biochemistry

|                              | Value | Unit   | Reference range |
|------------------------------|-------|--------|-----------------|
| Glucose                      | 4.4   | mmol/L | 4.1-5.6         |
| Urea <b>H</b>                | 8     | mmol/L | 2.1-7.1         |
| Potassium, K                 | 4.60  | mmol/L | 3.5-5           |
| Sodium, Na                   | 143   | mmol/L | 136-145         |
| Chloride, Cl                 | 103   | mmol/L | 98-106          |
| Calcium, Ca                  | 2.49  | mmol/L | 2.15-2.5        |
| Phosphate                    | 1.31  | mmol/L | 0.87-1.45       |
| Creatinine                   | 94    | µmol/L | 0-133           |
| Uric acid                    | 308   | µmol/L | 150-480         |
| Bilirubin, Total             | 11    | µmol/L | 5.1-17          |
| Bilirubin Direct             | 4     | µmol/L | 1.7-5.1         |
| Iron, Fe                     | 13    | µmol/L | 11.6-31.3       |
| Iron-binding capacity, total | 53.9  | µmol/L | 40.8-76.7       |

#### Protein and amino acid analysis

|                          | Value | Unit | Reference range |
|--------------------------|-------|------|-----------------|
| Proteins, total          | 74    | g/L  | 63-79           |
| SPE Albumin              | 48    | g/L  | 35-50           |
| Transferrin saturation % | 0.241 | 1    | 0.2-0.5         |
| Ferritin                 | 58    | µg/L | 30-300          |
| C-Reactive Protein, CRP  | 4     | mg/L | 0-5             |

#### Enzymes

|                                      | Value | Unit   | Reference range |
|--------------------------------------|-------|--------|-----------------|
| Alkaline Phosphatase, AP <b>L</b>    | 0.74  | µkat/L | 0.9-2.18        |
| Aspartate Aminotransferase, AST, GOT | 0.32  | µkat/L | 0.17-1          |
| Alanine Aminotransferase, ALT, GPT   | 0.33  | µkat/L | 0.22-0.68       |

|                   |     |       |                                |             |         |
|-------------------|-----|-------|--------------------------------|-------------|---------|
| Band neutrophil % | 0 1 | 0-0.1 | Gamma-Glutamyltransferase, GGT | 0.25 µkat/L | 0-0.94  |
| Plasmacytes %     | 0 1 | 0-0   | Lactate Dehydrogenase, LD      | 2.47 µkat/L | 1.7-3.2 |

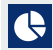

## Smart Blood Analytics Report

Model used: Hematology (CT181)

Report Date: 2017/05/30

| ICD | Prevalence | Prediction | Information | Description                                                                                             |
|-----|------------|------------|-------------|---------------------------------------------------------------------------------------------------------|
| D69 | 9.02%      | 60.40%     | 2.74        | <b>Purpura and other haemorrhagic conditions</b>                                                        |
| D50 | 14.45%     | 9.20%      | -0.65       | <b>Iron deficiency anaemia</b>                                                                          |
| D47 | 18.50%     | 4.80%      | -1.95       | <b>Other neoplasms of uncertain or unknown behaviour of lymphoid, haematopoietic and related tissue</b> |
| D75 | 6.64%      | 3.20%      | -1.05       | <b>Other diseases of blood and blood-forming organs</b>                                                 |
| D68 | 1.20%      | 3.20%      | 1.41        | <b>Other coagulation defects</b>                                                                        |
| D45 | 2.47%      | 2.80%      | 0.18        | <b>Polycythaemia vera</b>                                                                               |
| D66 | 0.52%      | 2.40%      | 2.20        | <b>Hereditary factor VIII deficiency</b>                                                                |
| C96 | 0.57%      | 1.80%      | 1.65        | <b>Other and unspecified malignant neoplasms of lymphoid, haematopoietic and related tissue</b>         |
| D56 | 0.39%      | 1.60%      | 2.04        | <b>Thalassaemia</b>                                                                                     |
| D46 | 5.56%      | 1.40%      | -1.99       | <b>Myelodysplastic syndromes</b>                                                                        |



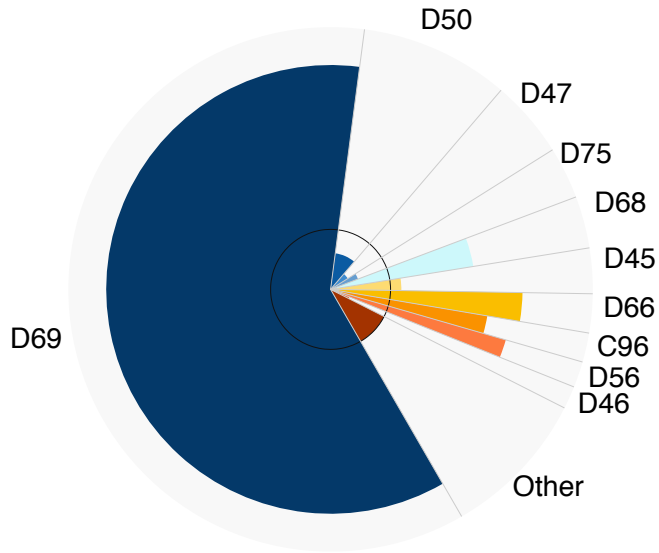

## Smart Blood Analytics report #622

**i** #84 primer 17

Male,  

### Blood Parameters

Lab Test Date: /

#### Hematology

|                                                 |          | Value  | Unit    | Reference range |
|-------------------------------------------------|----------|--------|---------|-----------------|
| Leukocyte count, WBC                            | <b>H</b> | 14.85  | 1E9/L   | 4-10            |
| Neutrophils count                               |          | 2.97   | 1E9/L   | 1.5-7.4         |
| Lymphocyte count                                | <b>H</b> | 11.29  | 1E9/L   | 1-3.4           |
| Monocyte count                                  |          | 0.30   | 1E9/L   | 0.21-0.92       |
| Eosinophils count                               |          | 0.15   | 1E9/L   | 0.02-0.67       |
| Basophils count                                 |          | 0.01   | 1E9/L   | 0-0.13          |
| Immature granulocytes count                     |          | 0      | 1E9/L   | 0-0             |
| Erythroblasts count                             | <b>H</b> | 0.09   | 1E9/L   | 0-0             |
| Neutrophils %                                   | <b>L</b> | 0.20   | 1       | 0.4-0.7         |
| Lymphocyte %                                    | <b>L</b> | 0.15   | 1       | 0.22-0.44       |
| Monocyte %                                      | <b>L</b> | 0.02   | 1       | 0.04-0.11       |
| Eosinophils %                                   |          | 0.01   | 1       | 0-0.08          |
| Basophils %                                     |          | 0.01   | 1       | 0-0.03          |
| Immature Granulocytes %                         |          | 0.003  | 1       | 0-0.01          |
| Erythroblast %                                  |          | 0      | 1       | 0-0             |
| Hemoglobin                                      | <b>L</b> | 82     | g/L     | 130-170         |
| Hematocrit                                      | <b>L</b> | 0.255  | 1       | 0.4-0.5         |
| Erythrocyte count, RBC                          | <b>L</b> | 2.84   | 1E12/L  | 4.5-5.9         |
| Mean Corpuscular Volume, MCV                    |          | 89.8   | fL      | 83-101          |
| Mean Corpuscular Hemoglobin, MCH                |          | 28.9   | pg/cell | 27-32           |
| Mean Corpuscular Hemoglobin Concentration, MCHC |          | 322    | g/L     | 315-345         |
| Erythrocyte Distribution Width, RDW             | <b>H</b> | 0.28   | 1       | 0.116-0.14      |
| Reticulocytes count, urgent automated           | <b>L</b> | 0.23   | 1E9/L   | 20-100          |
| Reticulocytes %                                 |          | 0.0081 | 1       | 0.005-0.025     |
| Hypochromic red cells %, Hypo-He                | <b>H</b> | 0.111  | 1       | 0-0.027         |
| Thrombocytes count, Platelet count              | <b>L</b> | 53     | 1E9/L   | 150-410         |
| Blast cells %                                   |          | 0      | 1       | 0-0.05          |
| Promyelocyte %                                  | <b>L</b> | 0      | 1       | 0.01-0.08       |
| Myelocytes %                                    |          | 0      | 1       | 0-0             |
| Metamyelocytes %                                | <b>L</b> | 0      | 1       | 0.13-0.32       |
| Band neutrophil %                               |          | 0      | 1       | 0-0.1           |

#### Blood gas analysis and hemoglobins

|                                            | Value | Unit   | Reference range |
|--------------------------------------------|-------|--------|-----------------|
| Reticulocyte hemoglobin equivalent, Ret-He | 28.8  | pg     | 28-35           |
| Carbon dioxide content, arterial blood     | 24    | mmol/L | 24-32           |

#### Biochemistry

|                              | Value | Unit   | Reference range |
|------------------------------|-------|--------|-----------------|
| Glucose                      | 5.4   | mmol/L | 4.1-5.6         |
| Urea                         | 4.8   | mmol/L | 2.1-7.1         |
| Potassium, K                 | 4.50  | mmol/L | 3.5-5           |
| Sodium, Na                   | 142   | mmol/L | 136-145         |
| Chloride, Cl                 | 106   | mmol/L | 98-106          |
| Calcium, Ca                  | 2.27  | mmol/L | 2.15-2.5        |
| Phosphate                    | 1.16  | mmol/L | 0.87-1.45       |
| Creatinine                   | 87    | µmol/L | 0-133           |
| Uric acid                    | 336   | µmol/L | 150-480         |
| Bilirubin, Total             | 13    | µmol/L | 5.1-17          |
| Bilirubin Direct             | 4     | µmol/L | 1.7-5.1         |
| Iron, Fe                     | 23.9  | µmol/L | 11.6-31.3       |
| Iron-binding capacity, total | 63.6  | µmol/L | 40.8-76.7       |

#### Protein and amino acid analysis

|                          | Value        | Unit | Reference range |
|--------------------------|--------------|------|-----------------|
| Proteins, total          | 78           | g/L  | 63-79           |
| SPE Albumin              | 41           | g/L  | 35-50           |
| Transferrin saturation % | 0.376        | 1    | 0.2-0.5         |
| Ferritin                 | <b>H</b> 340 | µg/L | 30-300          |
| C-Reactive Protein, CRP  | 4            | mg/L | 0-5             |

#### Enzymes

|                                      | Value         | Unit   | Reference range |
|--------------------------------------|---------------|--------|-----------------|
| Alkaline Phosphatase, AP             | <b>H</b> 2.20 | µkat/L | 0.9-2.18        |
| Aspartate Aminotransferase, AST, GOT | 0.69          | µkat/L | 0.17-1          |
| Alanine Aminotransferase, ALT, GPT   | 0.68          | µkat/L | 0.22-0.68       |

|                |                                                                                   |      |   |     |                                |                                                                                     |             |         |
|----------------|-----------------------------------------------------------------------------------|------|---|-----|--------------------------------|-------------------------------------------------------------------------------------|-------------|---------|
| Promonocytes % |                                                                                   | 0    | 1 | 0-0 | Gamma-Glutamyltransferase, GGT |  | 3.47 µkat/L | 0-0.94  |
| Plasmacytes %  |                                                                                   | 0    | 1 | 0-0 | Lactate Dehydrogenase, LD      |  | 3.75 µkat/L | 1.7-3.2 |
| Hairy cell %   |  | 0.61 | 1 | 0-0 |                                |                                                                                     |             |         |

|                                                                                                                       |                                |                         |
|-----------------------------------------------------------------------------------------------------------------------|--------------------------------|-------------------------|
|  <b>Smart Blood Analytics Report</b> | Model used: Hematology (CT181) | Report Date: 2017/05/30 |
|-----------------------------------------------------------------------------------------------------------------------|--------------------------------|-------------------------|

|                                                                                     | ICD | Prevalence | Prediction | Information | Description                                                                                             |
|-------------------------------------------------------------------------------------|-----|------------|------------|-------------|---------------------------------------------------------------------------------------------------------|
|    | C91 | 8.45%      | 19.40%     | 1.20        | <b>Lymphoid leukaemia</b>                                                                               |
|    | C92 | 7.01%      | 18.60%     | 1.41        | <b>Myeloid leukaemia</b>                                                                                |
|    | D46 | 5.56%      | 10.60%     | 0.93        | <b>Myelodysplastic syndromes</b>                                                                        |
|    | C83 | 2.02%      | 9.40%      | 2.22        | <b>Diffuse non-Hodgkin lymphoma</b>                                                                     |
|   | D47 | 18.50%     | 7.80%      | -1.25       | <b>Other neoplasms of uncertain or unknown behaviour of lymphoid, haematopoietic and related tissue</b> |
|  | D75 | 6.64%      | 5.20%      | -0.35       | <b>Other diseases of blood and blood-forming organs</b>                                                 |
|  | D69 | 9.02%      | 4.40%      | -1.04       | <b>Purpura and other haemorrhagic conditions</b>                                                        |
|  | C85 | 1.09%      | 3.60%      | 1.72        | <b>Other and unspecified types of non-Hodgkin lymphoma</b>                                              |
|  | C90 | 8.99%      | 2.80%      | -1.68       | <b>Multiple myeloma and malignant plasma cell neoplasms</b>                                             |
|  | D50 | 14.45%     | 2.40%      | -2.59       | <b>Iron deficiency anaemia</b>                                                                          |

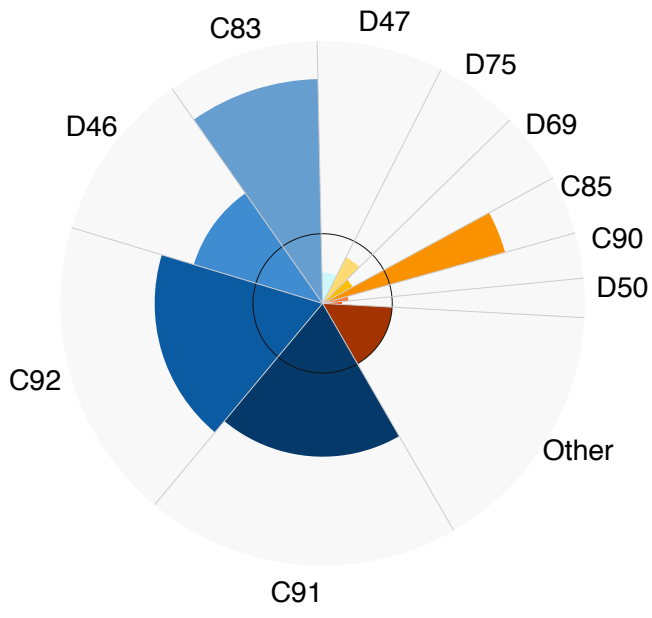

## Smart Blood Analytics report #623

**i** #85 primer 18

Female,

### Blood Parameters

Lab Test Date: /

#### Hematology

|                                                 |   | Value  | Unit    | Reference range |
|-------------------------------------------------|---|--------|---------|-----------------|
| Leukocyte count, WBC                            | H | 11.65  | 1E9/L   | 4-10            |
| Neutrophils count                               | H | 8.85   | 1E9/L   | 1.5-7.4         |
| Lymphocyte count                                |   | 1.75   | 1E9/L   | 1-3.4           |
| Monocyte count                                  | H | 1.05   | 1E9/L   | 0.21-0.92       |
| Eosinophils count                               | L | 0      | 1E9/L   | 0.02-0.67       |
| Basophils count                                 |   | 0.02   | 1E9/L   | 0-0.13          |
| Immature granulocytes count                     |   | 0      | 1E9/L   | 0-0             |
| Erythroblasts count                             | H | 0.04   | 1E9/L   | 0-0             |
| Neutrophils %                                   | H | 0.76   | 1       | 0.4-0.7         |
| Lymphocyte %                                    | L | 0.15   | 1       | 0.22-0.44       |
| Monocyte %                                      |   | 0.09   | 1       | 0.04-0.11       |
| Eosinophils %                                   |   | 0      | 1       | 0-0.08          |
| Basophils %                                     |   | 0      | 1       | 0-0.03          |
| Immature Granulocytes %                         |   | 0.008  | 1       | 0-0.01          |
| Erythroblast %                                  |   | 0      | 1       | 0-0             |
| Hemoglobin                                      | L | 75     | g/L     | 120-150         |
| Hematocrit                                      | L | 0.229  | 1       | 0.36-0.46       |
| Erythrocyte count, RBC                          | L | 2.24   | 1E12/L  | 4-5.2           |
| Mean Corpuscular Volume, MCV                    | H | 102.2  | fL      | 83-101          |
| Mean Corpuscular Hemoglobin, MCH                | H | 33.5   | pg/cell | 27-32           |
| Mean Corpuscular Hemoglobin Concentration, MCHC |   | 328    | g/L     | 315-345         |
| Erythrocyte Distribution Width, RDW             | H | 0.229  | 1       | 0.116-0.14      |
| Reticulocytes count, urgent automated           | H | 318.8  | 1E9/L   | 20-100          |
| Reticulocytes %                                 | H | 0.1423 | 1       | 0.005-0.025     |
| Hypochromic red cells %, Hypo-He                |   | 0.002  | 1       | 0-0.027         |
| Thrombocytes count, Platelet count              |   | 218    | 1E9/L   | 150-410         |
| Mean Platelet Volume, MPV                       |   | 11.5   | fL      | 9.2-12.9        |
| Platelet distribution width, PDW                |   | 14     |         | 11-16.9         |
| Blast cells %                                   |   | 0      | 1       | 0-0.05          |
| Promyelocyte %                                  | L | 0      | 1       | 0.01-0.08       |
| Myelocytes %                                    |   | 0      | 1       | 0-0             |

#### Blood gas analysis and hemoglobins

|                                            |   | Value | Unit | Reference range |
|--------------------------------------------|---|-------|------|-----------------|
| Reticulocyte hemoglobin equivalent, Ret-He | H | 35.8  | pg   | 28-35           |

#### Biochemistry

|                  |   | Value | Unit   | Reference range |
|------------------|---|-------|--------|-----------------|
| Glucose          |   | 4.4   | mmol/L | 4.1-5.6         |
| Urea             | H | 8.1   | mmol/L | 2.1-7.1         |
| Potassium, K     |   | 4.30  | mmol/L | 3.5-5           |
| Sodium, Na       |   | 141   | mmol/L | 136-145         |
| Chloride, Cl     | H | 107   | mmol/L | 98-106          |
| Calcium, Ca      |   | 2.19  | mmol/L | 2.15-2.5        |
| Creatinine       |   | 68    | µmol/L | 0-133           |
| Uric acid        |   | 249   | µmol/L | 90-360          |
| Bilirubin, Total | H | 41    | µmol/L | 5.1-17          |
| Bilirubin Direct | H | 14    | µmol/L | 1.7-5.1         |

#### Protein and amino acid analysis

|                                        |   | Value | Unit | Reference range |
|----------------------------------------|---|-------|------|-----------------|
| Proteins, total                        |   | 64    | g/L  | 63-79           |
| Troponin I                             |   | 0.006 | µg/L | 0-0.4           |
| C-Reactive Protein, CRP                | H | 8     | mg/L | 0-5             |
| SPE Albumin                            |   | 40    | g/L  | 35-50           |
| SPE alpha 1                            |   | 3.8   | g/L  | 2.3-4           |
| SPE alpha 2                            | L | 4.4   | g/L  | 5-9             |
| SPE beta 1                             |   | 3.8   | g/L  | 3-6             |
| SPE beta 2                             | L | 2.6   | g/L  | 5-10            |
| SPE gamma                              |   | 9     | g/L  | 7-17            |
| Albumin/Globulin Ratio electrophoresis | H | 1.7   |      | 1-1             |

#### Enzymes

|                                      |  | Value | Unit   | Reference range |
|--------------------------------------|--|-------|--------|-----------------|
| Alkaline Phosphatase, AP             |  | 1.19  | µkat/L | 0.71-1.67       |
| Aspartate Aminotransferase, AST, GOT |  | 0.24  | µkat/L | 0.17-1          |
| Alanine Aminotransferase, ALT,       |  | 0.22  | µkat/L | 0.17-0.48       |

|                   |                                       |   |   |           |
|-------------------|---------------------------------------|---|---|-----------|
| Metamyelocytes %  | <span style="color: orange;">L</span> | 0 | 1 | 0.13-0.32 |
| Band neutrophil % |                                       | 0 | 1 | 0-0.1     |
| Promonocytes %    |                                       | 0 | 1 | 0-0       |
| Plasmacytes %     |                                       | 0 | 1 | 0-0       |

### Tumor markers

|                                    | Value | Unit | Reference range |
|------------------------------------|-------|------|-----------------|
| Cancer antigen 15-3, CA 15-3       | 18.6  | kU/L | 0-30            |
| Carbohydrate Antigen 19-9, CA 19-9 | 3.0   | kU/L | 0-37            |
| Carcinoembryonic Antigen, CEA      | 0.5   | µg/L | 0-3.4           |

|                                |                                       |        |                |
|--------------------------------|---------------------------------------|--------|----------------|
| GPT                            |                                       |        |                |
| Gamma-Glutamyltransferase, GGT | 0.21                                  | µkat/L | 0-0.65         |
| Amylase, Total                 | 1.14                                  | µkat/L | 0.46-2.21      |
| Lipase                         | 0.64                                  | µkat/L | 0-0.65         |
| Lactate Dehydrogenase, LD      | <span style="color: orange;">H</span> | 4.38   | µkat/L 1.7-3.2 |

### Hormones and growth factors

|                                   | Value                                 | Unit | Reference range |
|-----------------------------------|---------------------------------------|------|-----------------|
| NT-Pro B-Type Natriuretic Peptide | <span style="color: orange;">H</span> | 365  | µg/L 0-64       |
| Procalcitonin                     | 0.10                                  | µg/L | 0-0.15          |

|                                                                                                                       |                                |                         |
|-----------------------------------------------------------------------------------------------------------------------|--------------------------------|-------------------------|
|  <b>Smart Blood Analytics Report</b> | Model used: Hematology (CT181) | Report Date: 2017/05/30 |
|-----------------------------------------------------------------------------------------------------------------------|--------------------------------|-------------------------|

|                                           | ICD | Prevalence | Prediction | Information | Description                                                                                             |
|-------------------------------------------|-----|------------|------------|-------------|---------------------------------------------------------------------------------------------------------|
| <span style="color: darkblue;">■</span>   | D59 | 0.95%      | 20.00%     | 4.40        | <b>Acquired haemolytic anaemia</b>                                                                      |
| <span style="color: blue;">■</span>       | D64 | 2.65%      | 14.60%     | 2.46        | <b>Other anaemias</b>                                                                                   |
| <span style="color: lightblue;">■</span>  | C90 | 8.99%      | 11.40%     | 0.34        | <b>Multiple myeloma and malignant plasma cell neoplasms</b>                                             |
| <span style="color: cyan;">■</span>       | D47 | 18.50%     | 7.40%      | -1.32       | <b>Other neoplasms of uncertain or unknown behaviour of lymphoid, haematopoietic and related tissue</b> |
| <span style="color: lightcyan;">■</span>  | D53 | 1.14%      | 6.40%      | 2.48        | <b>Other nutritional anaemias</b>                                                                       |
| <span style="color: yellow;">■</span>     | D46 | 5.56%      | 5.60%      | 0.01        | <b>Myelodysplastic syndromes</b>                                                                        |
| <span style="color: gold;">■</span>       | D50 | 14.45%     | 4.80%      | -1.59       | <b>Iron deficiency anaemia</b>                                                                          |
| <span style="color: orange;">■</span>     | C91 | 8.45%      | 4.40%      | -0.94       | <b>Lymphoid leukaemia</b>                                                                               |
| <span style="color: darkorange;">■</span> | C92 | 7.01%      | 4.00%      | -0.81       | <b>Myeloid leukaemia</b>                                                                                |
| <span style="color: red;">■</span>        | C88 | 1.00%      | 4.00%      | 2.00        | <b>Malignant immunoproliferative diseases</b>                                                           |

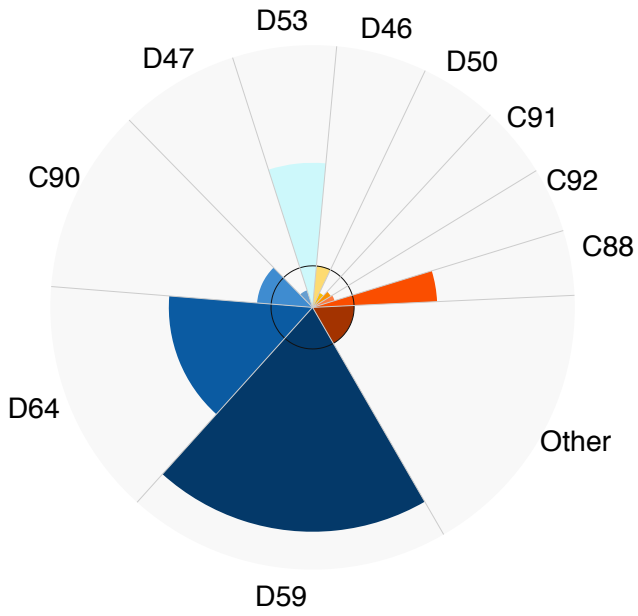

## Smart Blood Analytics report #624

**i** #86 primer 19

Male,  

### Blood Parameters

Lab Test Date: /

#### Hematology

|                                                 | Value           | Unit    | Reference range |
|-------------------------------------------------|-----------------|---------|-----------------|
| Leukocyte count, WBC                            | <b>H</b> 117.60 | 1E9/L   | 4-10            |
| Neutrophils count                               | <b>H</b> 14.11  | 1E9/L   | 1.5-7.4         |
| Lymphocyte count                                | <b>H</b> 11.76  | 1E9/L   | 1-3.4           |
| Monocyte count                                  | <b>H</b> 65.86  | 1E9/L   | 0.21-0.92       |
| Eosinophils count                               | <b>H</b> 1.18   | 1E9/L   | 0.02-0.67       |
| Basophils count                                 | <b>H</b> 0.61   | 1E9/L   | 0-0.13          |
| Immature granulocytes count                     | <b>H</b> 9.41   | 1E9/L   | 0-0             |
| Erythroblasts count                             | <b>H</b> 0.50   | 1E9/L   | 0-0             |
| Neutrophils %                                   | <b>L</b> 0.12   | 1       | 0.4-0.7         |
| Lymphocyte %                                    | <b>L</b> 0.10   | 1       | 0.22-0.44       |
| Monocyte %                                      | <b>H</b> 0.21   | 1       | 0.04-0.11       |
| Eosinophils %                                   | 0.01            | 1       | 0-0.08          |
| Basophils %                                     | 0.03            | 1       | 0-0.03          |
| Immature Granulocytes %                         | <b>H</b> 0.075  | 1       | 0-0.01          |
| Erythroblast %                                  | 0               | 1       | 0-0             |
| Hemoglobin                                      | <b>L</b> 60     | g/L     | 130-170         |
| Hematocrit                                      | <b>L</b> 0.170  | 1       | 0.4-0.5         |
| Erythrocyte count, RBC                          | <b>L</b> 1.60   | 1E12/L  | 4.5-5.9         |
| Mean Corpuscular Volume, MCV                    | <b>H</b> 106.3  | fL      | 83-101          |
| Mean Corpuscular Hemoglobin, MCH                | <b>H</b> 37.5   | pg/cell | 27-32           |
| Mean Corpuscular Hemoglobin Concentration, MCHC | <b>H</b> 353    | g/L     | 315-345         |
| Erythrocyte Distribution Width, RDW             | <b>H</b> 0.17   | 1       | 0.116-0.14      |
| Thrombocytes count, Platelet count              | <b>L</b> 38     | 1E9/L   | 150-410         |
| Mean Platelet Volume, MPV                       | 11.4            | fL      | 9.4-12.2        |
| Platelet distribution width, PDW                | <b>L</b> 10.8   |         | 11-16.9         |
| Blast cells %                                   | <b>H</b> 0.10   | 1       | 0-0.05          |
| Promyelocyte %                                  | 0.02            | 1       | 0.01-0.08       |
| Myelocytes %                                    | <b>H</b> 0.04   | 1       | 0-0             |
| Metamyelocytes %                                | <b>L</b> 0.02   | 1       | 0.13-0.32       |
| Band neutrophil %                               | 0               | 1       | 0-0.1           |
| Promonocytes %                                  | <b>H</b> 0.35   | 1       | 0-0             |
| Plasmacytes %                                   | 0               | 1       | 0-0             |

#### Biochemistry

|                              | Value         | Unit   | Reference range |
|------------------------------|---------------|--------|-----------------|
| Glucose                      | 4.9           | mmol/L | 4.1-5.6         |
| Urea                         | <b>H</b> 7.5  | mmol/L | 2.1-7.1         |
| Potassium, K                 | 3.8           | mmol/L | 3.5-5           |
| Sodium, Na                   | 137           | mmol/L | 136-145         |
| Chloride, Cl                 | 101           | mmol/L | 98-106          |
| Calcium, Ca                  | <b>L</b> 2.14 | mmol/L | 2.15-2.5        |
| Phosphate                    | <b>L</b> 0.71 | mmol/L | 0.87-1.45       |
| Creatinine                   | <b>H</b> 160  | µmol/L | 0-133           |
| Uric acid                    | <b>H</b> 605  | µmol/L | 150-480         |
| Bilirubin, Total             | 10            | µmol/L | 5.1-17          |
| Bilirubin Direct             | 5             | µmol/L | 1.7-5.1         |
| Iron, Fe                     | 23.5          | µmol/L | 11.6-31.3       |
| Iron-binding capacity, total | 51.9          | µmol/L | 40.8-76.7       |

#### Blood gas analysis and hemoglobins

|                                        | Value       | Unit   | Reference range |
|----------------------------------------|-------------|--------|-----------------|
| Carbon dioxide content, arterial blood | <b>L</b> 23 | mmol/L | 24-32           |

#### Protein and amino acid analysis

|                          | Value         | Unit | Reference range |
|--------------------------|---------------|------|-----------------|
| Proteins, total          | 76            | g/L  | 63-79           |
| SPE Albumin              | 41            | g/L  | 35-50           |
| Transferrin saturation % | 0.453         | 1    | 0.2-0.5         |
| Ferritin                 | <b>H</b> 1514 | µg/L | 30-300          |
| C-Reactive Protein, CRP  | <b>H</b> 55   | mg/L | 0-5             |

#### Enzymes

|                                      | Value         | Unit   | Reference range |
|--------------------------------------|---------------|--------|-----------------|
| Alkaline Phosphatase, AP             | <b>H</b> 2.67 | µkat/L | 0.9-2.18        |
| Aspartate Aminotransferase, AST, GOT | <b>H</b> 1.25 | µkat/L | 0.17-1          |
| Alanine Aminotransferase, ALT, GPT   | <b>H</b> 1.37 | µkat/L | 0.22-0.68       |
| Gamma-Glutamyltransferase, GGT       | <b>H</b> 2.95 | µkat/L | 0-0.94          |



Lactate Dehydrogenase, LD H 13.87  $\mu$ kat/L <sup>1.7-3.2</sup>

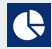

## Smart Blood Analytics Report

Model used: Hematology  
(CT181)

Report Date: 2017/05/30

| ICD | Prevalence | Prediction | Information | Description                                                                                             |
|-----|------------|------------|-------------|---------------------------------------------------------------------------------------------------------|
| C92 | 7.01%      | 44.80%     | 2.68        | <b>Myeloid leukaemia</b>                                                                                |
| C93 | 0.45%      | 9.40%      | 4.38        | <b>Monocytic leukaemia</b>                                                                              |
| D47 | 18.50%     | 7.60%      | -1.28       | <b>Other neoplasms of uncertain or unknown behaviour of lymphoid, haematopoietic and related tissue</b> |
| C83 | 2.02%      | 7.00%      | 1.79        | <b>Diffuse non-Hodgkin lymphoma</b>                                                                     |
| C91 | 8.45%      | 6.80%      | -0.31       | <b>Lymphoid leukaemia</b>                                                                               |
| D46 | 5.56%      | 6.00%      | 0.11        | <b>Myelodysplastic syndromes</b>                                                                        |
| C85 | 1.09%      | 2.80%      | 1.35        | <b>Other and unspecified types of non-Hodgkin lymphoma</b>                                              |
| D75 | 6.64%      | 2.60%      | -1.35       | <b>Other diseases of blood and blood-forming organs</b>                                                 |
| D64 | 2.65%      | 2.60%      | -0.03       | <b>Other anaemias</b>                                                                                   |
| D53 | 1.14%      | 2.00%      | 0.81        | <b>Other nutritional anaemias</b>                                                                       |

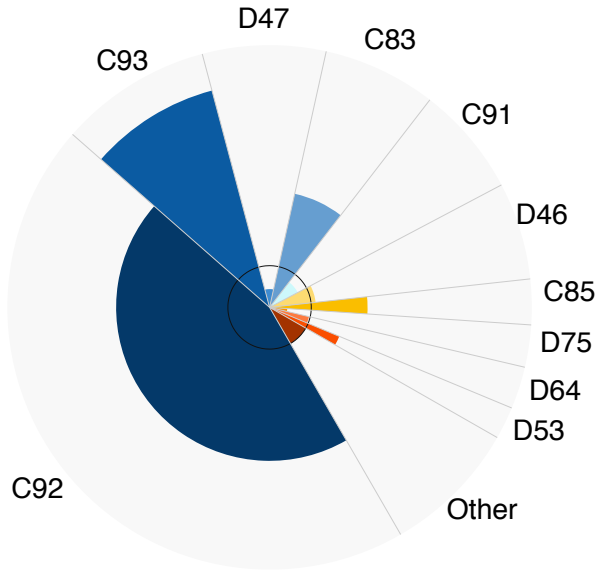

## Smart Blood Analytics report #626

**i** #87 primer 20

Male,  

### Blood Parameters

Lab Test Date: /

#### Hematology

|                                                 | Value          | Unit    | Reference range |
|-------------------------------------------------|----------------|---------|-----------------|
| Leukocyte count, WBC                            | 7.11           | 1E9/L   | 4-10            |
| Neutrophils count                               | 4.55           | 1E9/L   | 1.5-7.4         |
| Lymphocyte count                                | 1.64           | 1E9/L   | 1-3.4           |
| Monocyte count                                  | 0.64           | 1E9/L   | 0.21-0.92       |
| Eosinophils count                               | 0.21           | 1E9/L   | 0.02-0.67       |
| Basophils count                                 | 0.04           | 1E9/L   | 0-0.13          |
| Immature granulocytes count                     | 0              | 1E9/L   | 0-0             |
| Erythroblasts count                             | 0              | 1E9/L   | 0-0             |
| Neutrophils %                                   | 0.64           | 1       | 0.4-0.7         |
| Lymphocyte %                                    | 0.23           | 1       | 0.22-0.44       |
| Monocyte %                                      | 0.09           | 1       | 0.04-0.11       |
| Eosinophils %                                   | 0.03           | 1       | 0-0.08          |
| Basophils %                                     | 0.01           | 1       | 0-0.03          |
| Immature Granulocytes %                         | 0.004          | 1       | 0-0.01          |
| Erythroblast %                                  | 0              | 1       | 0-0             |
| Hemoglobin                                      | 139            | g/L     | 130-170         |
| Hematocrit                                      | 0.408          | 1       | 0.4-0.5         |
| Erythrocyte count, RBC                          | <b>L</b> 4.48  | 1E12/L  | 4.5-5.9         |
| Mean Corpuscular Volume, MCV                    | 91.1           | fL      | 83-101          |
| Mean Corpuscular Hemoglobin, MCH                | 31             | pg/cell | 27-32           |
| Mean Corpuscular Hemoglobin Concentration, MCHC | 341            | g/L     | 315-345         |
| Erythrocyte Distribution Width, RDW             | <b>H</b> 0.149 | 1       | 0.116-0.14      |
| Reticulocytes count, urgent automated           | 50.2           | 1E9/L   | 20-100          |
| Reticulocytes %                                 | 0.0112         | 1       | 0.005-0.025     |
| Hypochromic red cells %, Hypo-He                | 0.001          | 1       | 0-0.027         |
| Thrombocytes count, Platelet count              | 230            | 1E9/L   | 150-410         |
| Mean Platelet Volume, MPV                       | 10.1           | fL      | 9.4-12.2        |
| Platelet distribution width, PDW                | 11.6           |         | 11-16.9         |
| Blast cells %                                   | 0              | 1       | 0-0.05          |
| Promyelocyte %                                  | <b>L</b> 0     | 1       | 0.01-0.08       |
| Myelocytes %                                    | 0              | 1       | 0-0             |
| Metamyelocytes %                                | <b>L</b> 0     | 1       | 0.13-0.32       |

#### Blood gas analysis and hemoglobins

|                                            | Value | Unit   | Reference range |
|--------------------------------------------|-------|--------|-----------------|
| Reticulocyte hemoglobin equivalent, Ret-He | 34    | pg     | 28-35           |
| Carbon dioxide content, arterial blood     | 29    | mmol/L | 24-32           |

#### Biochemistry

|                              | Value         | Unit   | Reference range |
|------------------------------|---------------|--------|-----------------|
| Glucose                      | 5.1           | mmol/L | 4.1-5.6         |
| Urea                         | 5.5           | mmol/L | 2.1-7.1         |
| Potassium, K                 | 4.4           | mmol/L | 3.5-5           |
| Sodium, Na                   | 140           | mmol/L | 136-145         |
| Chloride, Cl                 | 100           | mmol/L | 98-106          |
| Calcium, Ca                  | 2.26          | mmol/L | 2.15-2.5        |
| Calcium corrected, Ca        | 2.49          | mmol/L | 2.1-2.6         |
| Phosphate                    | <b>H</b> 1.48 | mmol/L | 0.87-1.45       |
| Creatinine                   | 61            | µmol/L | 0-133           |
| Uric acid                    | 281           | µmol/L | 150-480         |
| Bilirubin, Total             | <b>L</b> 5    | µmol/L | 5.1-17          |
| Bilirubin Direct             | 2             | µmol/L | 1.7-5.1         |
| Iron, Fe                     | <b>L</b> 9.7  | µmol/L | 11.6-31.3       |
| Iron-binding capacity, total | 53.5          | µmol/L | 40.8-76.7       |

#### Protein and amino acid analysis

|                          | Value          | Unit | Reference range |
|--------------------------|----------------|------|-----------------|
| Proteins, total          | <b>L</b> 46    | g/L  | 63-79           |
| SPE Albumin              | <b>L</b> 27    | g/L  | 35-50           |
| Transferrin saturation % | <b>L</b> 0.181 | 1    | 0.2-0.5         |
| Ferritin                 | 140            | µg/L | 30-300          |
| C-Reactive Protein, CRP  | 4              | mg/L | 0-5             |
| Kappa free               | 19.1           | mg/L | 3.3-19.4        |
| Lambda free              | <b>H</b> 497   | mg/L | 5.71-26.3       |
| Kappa/Lambda coefficient | <b>L</b> 0.04  |      | 0.26-1.65       |
| Beta-2 microglobulin     | <b>H</b> 3.20  | mg/L | 0-2.7           |
| SPE alpha 1              | 3.8            | g/L  | 2.3-4           |
| SPE alpha 2              | 6.9            | g/L  | 5-9             |

|                   |   |   |       |            |   |     |     |      |
|-------------------|---|---|-------|------------|---|-----|-----|------|
| Band neutrophil % | 0 | 1 | 0-0.1 | SPE beta 1 |   | 3.5 | g/L | 3-6  |
| Promonocytes %    | 0 | 1 | 0-0   | SPE beta 2 | L | 1.8 | g/L | 5-10 |
| Plasmacytes %     | 0 | 1 | 0-0   | SPE gamma  | L | 3   | g/L | 7-17 |

|                                           |   |     |     |
|-------------------------------------------|---|-----|-----|
| Albumin/Globulin Ratio<br>electrophoresis | H | 1.4 | 1-1 |
|-------------------------------------------|---|-----|-----|

### Enzymes

|                                      | Value  | Unit   | Reference range |
|--------------------------------------|--------|--------|-----------------|
| Alkaline Phosphatase, AP             | 1.53   | µkat/L | 0.9-2.18        |
| Aspartate Aminotransferase, AST, GOT | 0.42   | µkat/L | 0.17-1          |
| Alanine Aminotransferase, ALT, GPT   | 0.36   | µkat/L | 0.22-0.68       |
| Gamma-Glutamyltransferase, GGT       | 0.17   | µkat/L | 0-0.94          |
| Lactate Dehydrogenase, LD            | H 3.36 | µkat/L | 1.7-3.2         |

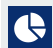

## Smart Blood Analytics Report

Model used: Hematology (CT181)

Report Date: 2017/05/30

| ICD | Prevalence | Prediction | Information | Description                                                                                             |
|-----|------------|------------|-------------|---------------------------------------------------------------------------------------------------------|
| C90 | 8.99%      | 36.20%     | 2.01        | <b>Multiple myeloma and malignant plasma cell neoplasms</b>                                             |
| D47 | 18.50%     | 29.40%     | 0.67        | <b>Other neoplasms of uncertain or unknown behaviour of lymphoid, haematopoietic and related tissue</b> |
| E85 | 0.73%      | 10.20%     | 3.81        | <b>Amyloidosis</b>                                                                                      |
| D50 | 14.45%     | 5.60%      | -1.37       | <b>Iron deficiency anaemia</b>                                                                          |
| D69 | 9.02%      | 3.20%      | -1.50       | <b>Purpura and other haemorrhagic conditions</b>                                                        |
| D75 | 6.64%      | 3.20%      | -1.05       | <b>Other diseases of blood and blood-forming organs</b>                                                 |
| D76 | 0.23%      | 1.40%      | 2.60        | <b>Certain diseases involving lymphoreticular tissue and reticulohistiocytic system</b>                 |
| C92 | 7.01%      | 1.20%      | -2.55       | <b>Myeloid leukaemia</b>                                                                                |
| C83 | 2.02%      | 1.00%      | -1.01       | <b>Diffuse non-Hodgkin lymphoma</b>                                                                     |
| D64 | 2.65%      | 1.00%      | -1.41       | <b>Other anaemias</b>                                                                                   |

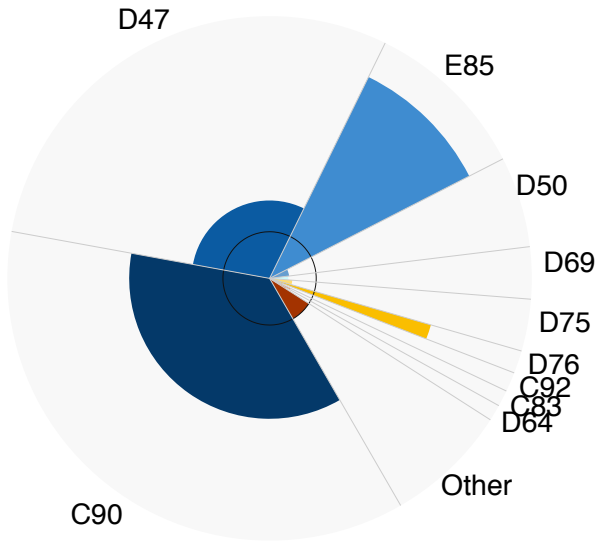

**Supplementary Table S3. 43 different haematological categories of diseases that were identified among the 8233 cases analysed**

| ICD code | Disease                                                                                          |
|----------|--------------------------------------------------------------------------------------------------|
| C81      | Hodgkin lymphoma                                                                                 |
| C82      | Follicular [nodular] non-Hodgkin lymphoma                                                        |
| C83      | Diffuse non-Hodgkin lymphoma                                                                     |
| C84      | Peripheral and cutaneous T-cell lymphomas                                                        |
| C85      | Other and unspecified types of non-Hodgkin lymphoma                                              |
| C88      | Malignant immunoproliferative diseases                                                           |
| C90      | Multiple myeloma and malignant plasma cell neoplasms                                             |
| C91      | Lymphoid leukaemia                                                                               |
| C92      | Myeloid leukaemia                                                                                |
| C93      | Monocytic leukaemia                                                                              |
| C94      | Other leukaemias of specified cell type                                                          |
| C95      | Leukaemia of unspecified cell type                                                               |
| C96      | Other and unspecified malignant neoplasms of lymphoid, haematopoietic and related tissue         |
| D45      | Polycythaemia vera                                                                               |
| D46      | Myelodysplastic syndromes                                                                        |
| D47      | Other neoplasms of uncertain or unknown behaviour of lymphoid, haematopoietic and related tissue |
| D50      | Iron deficiency anaemia                                                                          |
| D51      | Vitamin B12 deficiency anaemia                                                                   |
| D52      | Folate deficiency anaemia                                                                        |
| D53      | Other nutritional anaemias                                                                       |
| D56      | Thalassaemia                                                                                     |
| D58      | Other hereditary haemolytic anaemias                                                             |
| D59      | Acquired haemolytic anaemia                                                                      |
| D60      | Acquired pure red cell aplasia [erythroblastopenia]                                              |
| D61      | Other aplastic anaemias                                                                          |
| D62      | Acute posthaemorrhagic anaemia                                                                   |
| D63      | Anaemia in chronic diseases classified elsewhere                                                 |
| D64      | Other anaemias                                                                                   |
| D65      | Disseminated intravascular coagulation [defibrination syndrome]                                  |
| D66      | Hereditary factor VIII deficiency                                                                |
| D67      | Hereditary factor IX deficiency                                                                  |
| D68      | Other coagulation defects                                                                        |
| D69      | Purpura and other haemorrhagic conditions                                                        |
| D70      | Agranulocytosis                                                                                  |
| D72      | Other disorders of white blood cells                                                             |
| D73      | Diseases of spleen                                                                               |
| D75      | Other diseases of blood and blood-forming organs                                                 |
| D76      | Certain diseases involving lymphoreticular tissue and reticulohistiocytic system                 |
| D84      | Other immunodeficiencies                                                                         |
| E75      | Disorders of sphingolipid metabolism and other lipid storage disorders                           |
| E85      | Amyloidosis                                                                                      |
| I78      | Diseases of capillaries                                                                          |
| M31      | Other necrotising vasculopathies                                                                 |
